1 **HIV corruption of the Arp2/3-Cdc42-IQGAP1 axis to hijack cortical F-Actin**  
2 **to promote cell-cell viral spread.**

3  
4 Anupriya Aggarwal<sup>1</sup>, Alberto Ospina Stella<sup>1</sup>, Catherine Henry<sup>2,3,\*</sup>, Kedar Narayan<sup>2,3</sup> &  
5 Stuart G. Turville<sup>1</sup>  
6

7 <sup>1</sup> The Kirby Institute, University of New South Wales, New South Wales, Australia.

8 <sup>2</sup> Center for Molecular Microscopy, Center for Cancer Research, National Cancer Institute,  
9 National Institutes of Health, Bethesda, Maryland, USA.

10 <sup>3</sup> Cancer Research Technology Program, Frederick National Laboratory for Cancer Research,  
11 Frederick, Maryland, USA.

12 \* Current address: David H. Koch Institute for Integrative Cancer Research, Massachusetts  
13 Institute of Technology, Cambridge, MA, United States  
14  
15  
16

17 *Corresponding Author:*

18 Stuart G. Turville

19 The Kirby Institute, UNSW Australia

20 Office 529 Level 5 Wallace Wurth Building,

21 UNSW, Sydney NSW 2052

22 Telephone: +61 (02) 9385 0462

23 Email: [sturville@kirby.unsw.edu.au](mailto:sturville@kirby.unsw.edu.au)  
24

1 **Abstract**

2 F-Actin remodelling is important for the spread of HIV via cell-cell contacts, yet the  
3 mechanisms by which HIV corrupts the actin cytoskeleton are poorly understood. Through  
4 live cell imaging and focused ion beam scanning electron microscopy (FIB-SEM), we observed  
5 F-Actin structures that exhibit strong positive curvature to be enriched for HIV buds. Virion  
6 proteomics, gene silencing, and viral mutagenesis supported a Cdc42-IQGAP1-Arp2/3  
7 pathway as the primary intersection of HIV budding, membrane curvature and F-Actin  
8 regulation. Whilst HIV egress activated the Cdc42-Arp2/3 filopodial pathway, this came at the  
9 expense of cell-free viral release. Importantly, release could be rescued by cell-cell contact,  
10 provided Cdc42 and IQGAP1 were present. From these observations we conclude that out-  
11 going HIV has corrupted a central F-Actin node that enables initial coupling of HIV buds to  
12 cortical F-Actin to place HIV at the leading cell edge. Whilst this initially prevents particle  
13 release, maturation of cell-cell contacts signals back to this F-Actin node to enable viral release  
14 & subsequent infection of the contacting cell.

15  
16  
17  
18  
19

## 1 **Introduction**

2  
3 Actin is a major component of the cellular cytoskeleton and is present in both monomeric  
4 globular (G-actin) and polymeric filamentous (F-actin) forms in all eukaryotic cells.  
5 Specifically in human leukocytes, actin accounts for over 10% of the total protein content [1]  
6 and is a prerequisite for many pathways involved in communication of the immune response,  
7 such as chemotaxis of leukocytes through to the formation of supramolecular structures like  
8 the immunological synapse- a fundamental structure driving the primary immune response  
9 [2,3]. While cells encode a wide range of proteins that mediate F-actin remodelling, the critical  
10 ability to seed or 'nucleate' F-actin from the monomeric G-actin pool is limited to only a few  
11 protein families [4]. The two major classes of cellular actin nucleators are the Arp2/3 complex  
12 and formins [5]. The Arp2/3 complex is composed of 7 different subunits and allows formation  
13 of branched actin networks, through nucleation of a branch filament from an existing mother  
14 filament at an angle of 70 degrees [6,7]. In contrast, formins are large multidomain proteins that  
15 drive nucleation and/or elongation of unbranched linear actin filaments (reviewed in [4,8]. The  
16 activity of cellular Arp2/3 and formins is tightly regulated by a complex network of signalling  
17 pathways that primarily rely on the molecular switch properties of Rho-GTPases, such as Rac1  
18 and Cdc42, for their activation [9,10].  
19

20 HIV infection and spread proceeds primarily in CD4 positive leukocytes of our immune system  
21 [11]. Viral spread can be observed at two levels. Firstly, free virus release from infected cells,  
22 with virions travelling in a cell-free form until encountering a new target cell to infect.  
23 Secondly, HIV budding that occurs directly at sites of cell-cell contact. The supramolecular  
24 structure that enables the latter and highly efficient cell-cell viral transfer is referred to as the  
25 virological synapse (VS) [12,13]. In both cases, viral budding needs to proceed at the plasma  
26 membrane (PM) of infected cells and is initially driven by oligomerisation of the HIV structural  
27 protein Gag [14] and culminates with HIV particle abscission mediated by cellular proteins of  
28 the endosomal sorting complexes required for transport machinery (ESCRT) [15]. Several F-  
29 actin structures have been previously observed in association with HIV assembly and higher-  
30 level Gag oligomerisation. These include; the temporal formation of F-Actin asters/stars that  
31 appear just underneath the PM prior to particle release [16], and assembling HIV particles  
32 decorating the tips of finger-like filopodial structures [17-19]. It is however unclear how these  
33 events are mechanistically connected and how coupling to the F-actin cytoskeleton benefits  
34 HIV release/spread [20]. This can be considered at two-levels: firstly how does F-Actin  
35 regulation influence the assembly and release of cell free virus in infected cells? For instance,  
36 do cortical F-Actin structures facilitate HIV assembly and release at the PM as observed for  
37 other viruses [21]? Secondly, how is F-actin regulated at cell-cell contacts involving HIV  
38 infected cells? Several studies have shown that functional actin dynamics are required for cell-  
39 cell viral transfer [13,22], yet how HIV assembly and release are spatiotemporally coordinated  
40 during this process has not been clarified mechanistically.  
41

42 With our primary aim to determine the role for F-Actin in cell-free HIV egress and cell-cell  
43 viral transfer, herein we peeled back the complexity of F-Actin regulation in leukocytes by  
44 successive depletion and/or knockout of key actin nucleators and other associated proteins that  
45 regulate their activity. In doing so, we biased the formation of different cortical F-Actin  
46 structures such as filopodia and lamellipodia. Herein we define these structures as outlined by  
47 Mattila and Lappalainen, i.e. Filopodia are cylindrical finger like protrusions approximately 100–  
48 300 nm in diameter and up to 1µm to 10 µm or more in length, whereas lamellipodia are thin  
49 (100 nm to 200 nm thick) sheet/viel like cortical F-Actin protusions [23]. Whilst the regulation  
50 of lamellipodia is well understood and primarily depends on branched F-actin nucleation by

1 the Arp2/3 complex downstream of Rac1 and its effector Wave2 [24-29], various models have  
2 been proposed for filopodia formation and increasing evidence suggests this process may be  
3 cell-type specific [23,30]. Importantly, little is known about the mechanism of filopodia  
4 formation in cells of hematopoietic lineage, despite the fact that filopodia play important roles  
5 in immune cell function.

6  
7 Using a combination of live cell imaging, focused ion beam scanning electron microscopy  
8 (FIB-SEM), virion mass spectrometry and viral infection assays, we observed the influence of  
9 HIV on cortical F-Actin at several levels. First, FIB-SEM revealed HIV budding to be  
10 relatively enriched in areas of high positive membrane curvature within Arp2/3-dependent  
11 cortical F-Actin structures, including filopodia and lamellipodia. Second, virion mass  
12 spectrometry identified a cortical F-Actin signalling node comprising of the Arp2/3 related  
13 GTPases Rac1 and Cdc42 and their binding partner, the scaffolding protein IQGAP1. Finally,  
14 while depletion of a number of dominant F-actin regulators was observed to affect free virus  
15 release, cell-cell viral transfer was only significantly impaired in cells depleted of Cdc42 or  
16 IQGAP1. Collectively these observations support a dominant role of the GTPase Cdc42 and  
17 IQGAP1 in the final stages of viral egress and cell-cell spread. In this setting we propose HIV  
18 manipulation of the Cdc42/IQGAP1 node to be important at two levels: firstly it enables HIV  
19 to be embedded and retained in Arp2/3-dependent leading edge structures that are important  
20 during pre-synaptic events. Secondly, as the VS is engaged and matures, the same regulators  
21 likely coordinate F-Actin dynamics to enable conditions that facilitate final viral particle  
22 release.

## 23 24 25 **Results**

### 26 27 Moulding cortical F-Actin through formin and Arp2/3 depletion

28  
29 A physical association of HIV with F-actin structures has been previously observed in all major  
30 HIV primary target cell types [18,31]. In infected CD4+ T-cells and dendritic cells this manifests  
31 in the form of HIV-Filopodia, which are F-actin rich finger-like structures with HIV assembly  
32 observed at their tips [18]. Since these structures are more prominent on dendritic cells and  
33 similarly enriched in U937 cells [18,32,33], this latter myeloid cell line provides an ideal model  
34 to dissect the link between F-Actin and HIV assembly in the specific context of hematopoietic  
35 cell lineages. Given the proposed role of Arp2/3 and formins in filopodia formation in other  
36 cell types, we initially focused on these key actin regulators for depletion. However, while  
37 Arp2/3 is ubiquitously expressed in eukaryotic cells, there are at least 15 different formins in  
38 vertebrates [34,35]. Since Diaph1, Diaph2 and FMNL1 are the most abundantly expressed in  
39 leukocytes [36], we tailored our initial shRNA screening to depletion of these formins.  
40 Disruption of filopodial networks was assessed by measuring filopodial abundance (average  
41 number of filopodia per cell) and length (average filopodial length measured from the PM to  
42 the tip). To this end we used several imaging techniques at increasing levels of resolution,  
43 including; i) live cell imaging, ii) fixed cell fluorescence imaging followed by 3D  
44 deconvolution, and iii) the power of correlative FIB-SEM to finely resolve F-Actin structures  
45 closer to the PM. In brief, FIB-SEM represents a method where iterative cycles of finely tuned  
46 ion abrasion milling are followed by high-resolution scanning electron microscopy of heavy-  
47 metal stained, resin-embedded cell samples [37,38]. The end result is the recording of a stack of  
48 2D back-scatter electron images, which are then processed and converted to a 3D image  
49 volume, typically at ~ 10 nm pixel sampling (Fig.1 B-E). This method provides a powerful  
50 imaging tool for cell biology and virology, as it gives users the ability to resolve nanoscale

1 ultrastructural features in cellular samples that may appear in association with viral particles  
2 [39,40].  
3

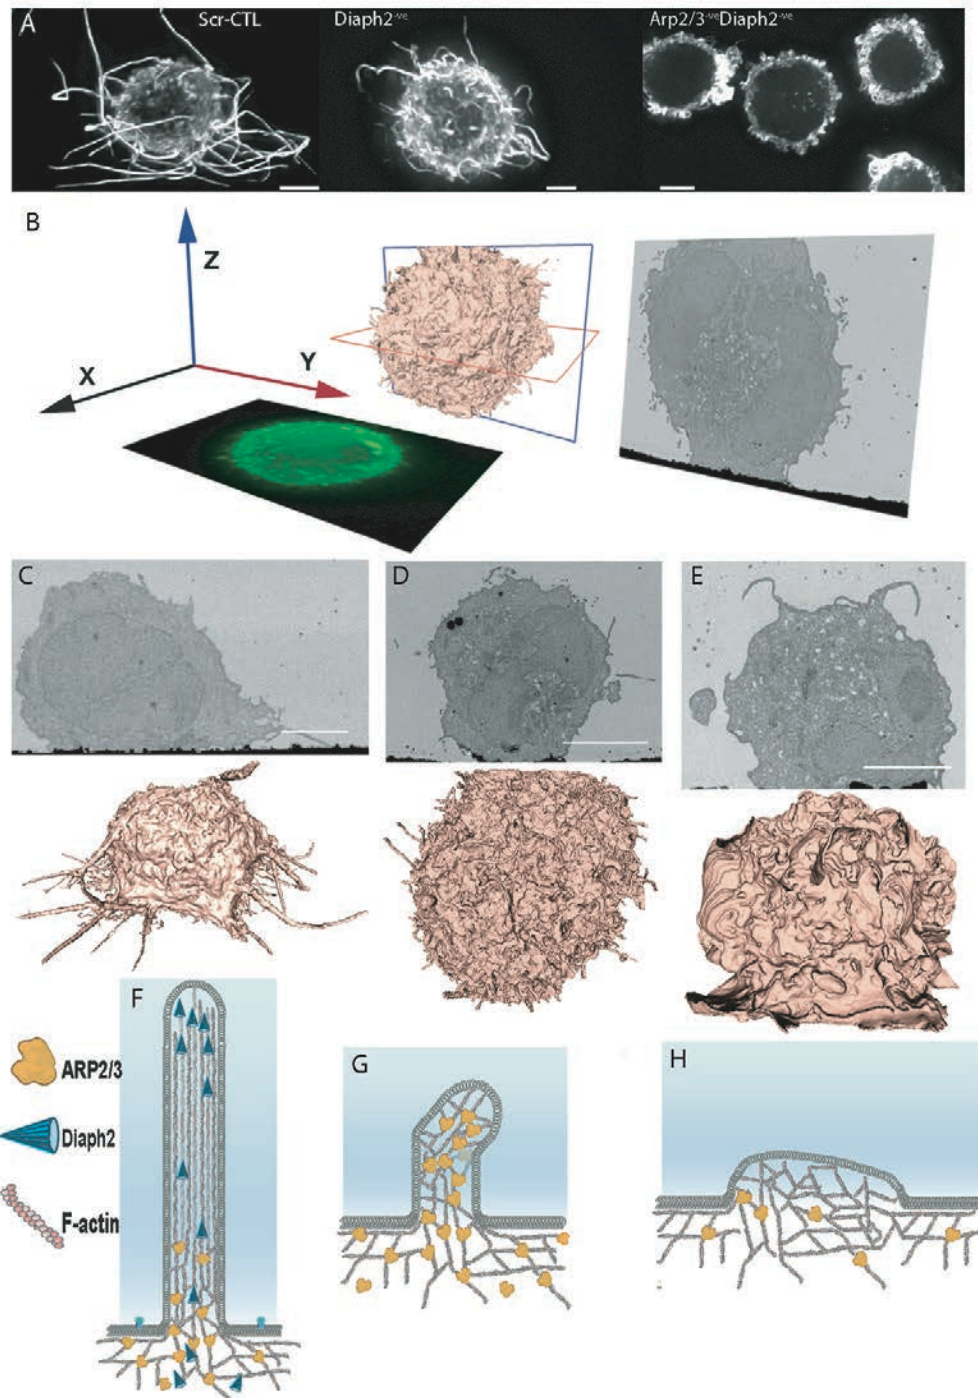

4  
5 **Figure 1. Depletion of F-actin regulators reveals long filopodial networks to be driven**  
6 **by Arp2/3 and Diaph2.**  
7 A. F-Actin staining by phalloidin Alexa-647 reveals extensive and long filopodia in uninfected  
8 scramble shRNA control cells (Scr-CTL), short abundant filopodia upon deletion of the formin  
9 Diaph2, and extensive lamellipodia when both Diaph2 and Arp2/3 are co-depleted. B.  
10 Schematic representation of FIB-SEM imaging data. C-E. FIB-SEM 2D images (upper) and  
11 3D reconstructions (lower) of C. non-depleted control cells (Scr-CTL), D. Diaph2-depleted  
12 cells and E. Diaph2 and Arp2/3 co-depleted cells. All scale bars are 5µm. F-H. Schematic

1 representation of phenotypes induced by loss of F-Actin regulators. F. Wildtype scenario, G.  
2 Diaph2 deficiency, H. Diaph2 & Arp2/3 deficiency. Note in H. we represent reduced levels of  
3 Arp2/3, given its high cellular abundance and residual levels of Arp2/3 in our knockdown cells  
4 (Fig. S3).

5  
6 Initial experiments revealed filopodial lengths to be dependent solely on the formin Diaph2  
7 and not the other leukocyte-enriched formins (Fig. S1). Silencing of Diaph2 by shRNA  
8 achieved >95% depletion at the protein level (Fig. S3), and in these cells cortical F-Actin  
9 coalesced into a network of abundant and short (1 to 3 $\mu$ m) filopodia (Fig. 1E&H; Movie S1).  
10 Since we could confirm this phenotype in CRISPR/Cas9-generated and clonally expanded  
11 Diaph2 homozygous knockout cells, our observations suggest that filopodial length but not  
12 seeding is dependent on Diaph2. Subsequent shRNA codepletion of other expressed formins  
13 in addition to Diaph2 did also not disrupt this short filopodial network (Fig. S1). Therefore, to  
14 test if the shorter but more abundant filopodia were Arp2/3-dependent, we disrupted both  
15 Diaph2 and the Arp2/3 complex by shRNA. Co-depletion led to short filopodia converging  
16 into an extensive lamellipodial network (Fig. 1A,E&H; Movie S2). To conclude, we could  
17 readily control cortical F-Actin within this leukocyte landscape, and generate three unique cell  
18 types with a continuum of cortical F-actin structures; i) long filopodia, ii) abundant short  
19 filopodia, and iii) an extensive network of large lamellipodia. Furthermore, our observations  
20 indicate that seeding of filopodia in myeloid cells requires Arp2/3-mediated actin nucleation,  
21 whereas filopodial elongation is dependent on the formin Diaph2 (Fig. 1. F-H).

### 22 23 The influence of shifting F-Actin structures on the location of HIV budding

24 In the context of HIV infected cells, we used our high-resolution imaging approaches to probe  
25 for a possible link between HIV assembly and specific F-Actin structures and/or pathways in  
26 leukocytes. Previously we have observed live cells with long filopodia to have significant  
27 numbers of HIV positive tips [18], and readily concluded that in untreated cells HIV assembly  
28 is enriched to this site. However, detection of HIV buds in cells with short filopodia (i.e.  
29 depleted of Diaph2) was constrained by the inability to resolve F-Actin structures proximal to  
30 the PM by fluorescence microscopy alone. Thus, we applied FIB-SEM imaging to HIV-  
31 infected Diaph2<sup>-ve</sup> cells (short filopodia) and observed HIV buds in routine association with  
32 the tip and sides of these structures (Fig. 2A,B,E&H). In cells with prominent lamellipodia  
33 (Diaph2<sup>-ve</sup>Arp2/3<sup>-ve</sup>), FIB-SEM imaging revealed abundance of HIV buds along the ridges of  
34 lamellipodia (Fig. 2F&K; Movie S2). Therefore one common feature of each F-Actin structure  
35 was the appearance of HIV preferentially in areas of positive membrane curvature. Given the  
36 large topological differences between filopodia and lamellipodia, we assessed viral-bud density  
37 by accounting for the surface area available for budding within each distinct F-Actin structure.  
38 This revealed HIV buds to be significantly enriched in areas of high positive membrane  
39 curvature (Table SI; Fig. 2 G-L): Lamellipodial ridges and filopodia were the most active areas  
40 of viral assembly, with a distinct preference for the latter (filopodia tips outsourced lamellipodial  
41 ridges by 5-fold, when surface area was considered). This observation supports two potential  
42 mechanisms. First, HIV assembly is facilitated by areas of positive curvature or alternatively,  
43 HIV assembly recruits/influences cellular protein(s) at the PM that can lead to positive  
44 curvature.

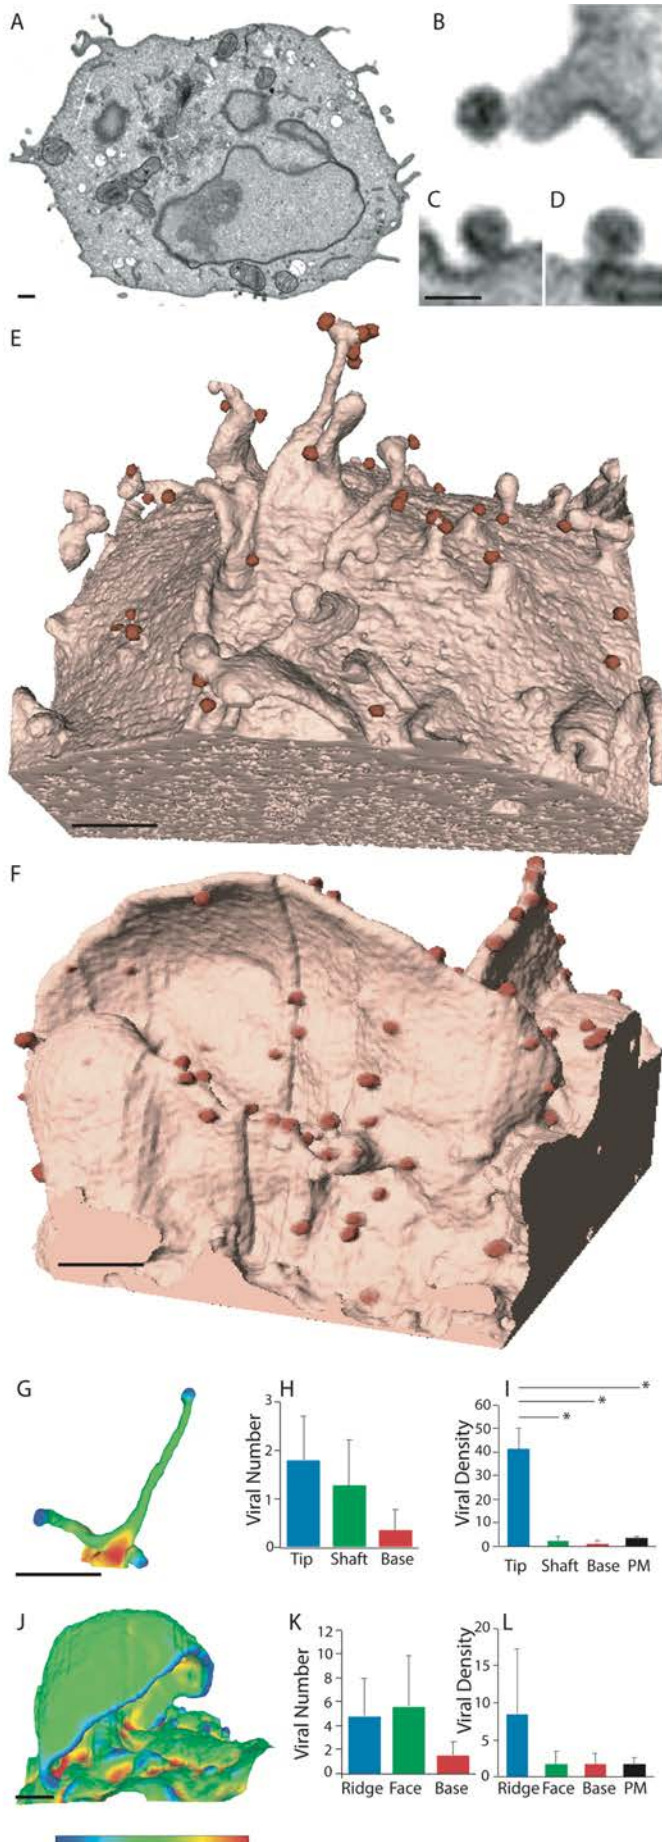

**Figure 2. HIV budding enriched to positively curved cortical F-Actin.**

A-D Representative FIB-SEM images of HIV virions associated with B. Filopodia and C-D plasma membrane of a HIV infected cell depleted of *Diaph2*. E-F. 3D rendering FIB-SEM images of HIV infected E. *Diaph2*<sup>-ve</sup> and F. *Diaph2*<sup>-ve</sup>*Arp2/3*<sup>-ve</sup> cell clones. HIV buds are shaded in red to highlight their location. G&J. enumeration of HIV-buds in association with positively curved cortical F-Actin structures. G. Filopodia and J. lamellipodia are pseudocolored using a colour spectrum from blue (positive curvature), green (neutral curvature) to red (negative curvature). H-I Enumeration of total HIV buds in association with the filopodia in *Diaph2*<sup>-ve</sup> cells. H. Absolute viral bud counts and I. HIV bud density per  $\mu\text{m}^2$ . K-L. Enumeration of total HIV buds in association with the lamellipodia in *Diaph2*<sup>-ve</sup> *Arp2/3*<sup>-ve</sup> cells. K. Absolute viral bud counts and L. HIV bud density per  $\mu\text{m}^2$ . All scale bars are  $0.5\mu\text{m}$  with the exception of B-D, which is  $0.1\mu\text{m}$ . Bar graphs in H-I represent mean and standard deviations of virion counts from  $n = 15$  filopodial structures. K-L bar graphs represent mean and standard deviations of virion counts from  $n = 15$  lamellipodial structures. Statistics for panels G-L are summarised in Table SI. \* $P > 0.05$

1 Filopodia dominated by the formin Diaph2 present positive curvature at the plasma  
2 membrane but exclude assembling HIV particles

3 To assess whether strong positive membrane curvature alone was sufficient to position HIV  
4 buds at filopodial tips, we induced long filopodia using a constitutively active (C/A) mutant of  
5 Diaph2. Diaphanous-related formins exist in an autoinhibited conformation mediated by the  
6 interaction between their N-proximal inhibitory domain (DID) and C-terminal autoregulatory  
7 domain (DAD) [36,41]. Disruption of this autoinhibitory state can be achieved by formins  
8 binding to Rho-GTPases or, as in our case, by deletion of their C-terminal DAD domain [42,43].  
9 Importantly, in both cases the central actin polymerization domain of the formin is rendered  
10 constitutively active.

11

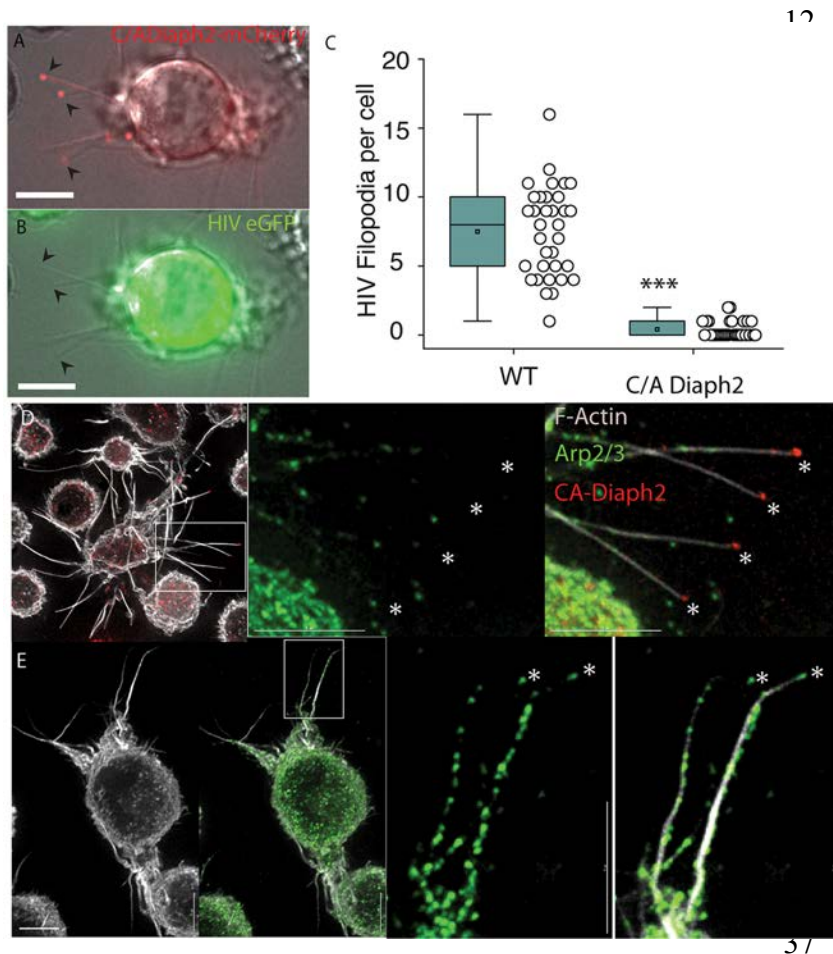

38 **Figure 3. Constitutively active Diaph2 driven Filopodia are not associated with HIV buds.**

39 A & B. Live still images from supplement Movie S3; A. <sup>C/A</sup>Diaph2-mCherry (red) positive  
40 cells, infected with B. HIViGFP (green). Note Diaph2 at the tips of filopodia are negative for  
41 HIV. Scale bars are at 5µm. C. Quantification of HIV positive filopodia per cell in HIV infected  
42 live cell cultures. HIV filopodia counts pooled from three independent HIV infections  
43 \*\*\*p<0.0001. D&E. Immunofluorescent Arp2/3 staining of D. <sup>C/A</sup>Diaph2-mCherry (red)  
44 positive cells and E. Untreated cells. Asterisks highlight the terminal ends of filopodia that are  
45 either Diaph2 positive & Arp2/3 negative (for <sup>C/A</sup>Diaph2-mCherry) or Arp2/3 positive (for  
46 untreated cells).

47

48

49

50



1  
2 If HIV assembly was directly promoted by positive membrane curvature, filopodia induced by  
3 Diaph2<sup>C/A</sup> would incorporate assembling viral particles. However, while Diaph2<sup>C/A</sup> expression  
4 readily induced the formation of long straight filopodia with Diaph2 accumulating at the  
5 filopodial tips (Fig. 3A & Movie S3), in HIV infected cells we also observed complete  
6 exclusion of HIV particles from the tips of these structures (Fig. 3A-C & Movie S3). Therefore,  
7 the strong membrane curvature in filopodial tips alone is not sufficient to recruit HIV assembly  
8 to this region. Since long filopodia in WT cells are routinely HIV positive, whereas straight  
9 C/A Diaph2 driven filopodia are not, it is unlikely that formins represent the link of HIV to the  
10 F-actin cytoskeleton. We then turned our attention to the Arp2/3 complex, given that previous  
11 observations propose this as the dominant F-actin nucleator at the cell cortex, with formin  
12 activity being restricted to filament elongation post F-actin nucleation [44,45]. To confirm if  
13 Arp2/3 was the dominant filopodial nucleator in WT versus Diaph2<sup>C/A</sup> cells, we  
14 immunostained filopodia for Arp2/3, and examined the footprint of this nucleator along the  
15 filopodial body and tip. In both cell types, the filopodial bases (3µm from the membrane) were  
16 all Arp2/3 positive (Fig. 3D & E). In contrast, the filopodial tips of Diaph2<sup>C/A</sup> cells were  
17 negative for Arp2/3 antigen (Fig. 3D), whereas Arp2/3 was frequently observed along the  
18 entire shaft and at the tip of wildtype filopodia (Fig. 3E). To quantify the extent of Arp2/3 tip  
19 exclusion, we measured the distance from the tip of filopodia to the first detectable Arp2/3  
20 signal and observed a significantly greater distance of Arp2/3 from the filopodial tip in  
21 Diaph2<sup>C/A</sup> cells relative to WT cells (6.2µm versus 1.4µm;  $p > 0.0001$ ;  $n = 50$ ). In summary, by  
22 mapping the HIV budding sites at high resolution we could reach several conclusions. Firstly,  
23 HIV buds primarily enrich to cortical F-Actin structures with positive curvature. Secondly,  
24 positive curvature and/or Diaph2 activity alone are not responsible for the enrichment of HIV  
25 buds to these sites. Finally, Arp2/3-dependent cortical F-actin structures are primarily HIV  
26 positive.

27

### 28 HIV Gag can influence Arp2/3 dependent F-Actin pathways

29 Since HIV assembly at the PM is primarily driven by HIV-Gag, we turned to strategic Gag  
30 mutagenesis in an attempt to resolve the link of HIV assembly with cortical F-Actin structures.  
31 The HIV Gag mutant panel covered several well characterised mutants that could maintain  
32 HIV particle assembly and also binding to membrane Phosphatidylinositol (4,5)-bisphosphate  
33 (PIP2). Deletion of HIV Gag p6 and mutagenesis of the PTAP motif in p6, was used to block  
34 the recruitment of TSG101 and related ESCRT proteins involved in viral particle abscission  
35 (Fig. 4A-B). We also deleted the Nucleocapsid (NC) domain, as this has been previously  
36 proposed to mediate the interaction between HIV-Gag and F-actin [46,47]. However, since NC  
37 is required to facilitate higher order oligomerisation of Gag [48], we replaced NC with the  
38 Leucine Zipper (LZ) domain from the *Saccharomyces cerevisiae* GCN4 protein (Fig. 4C), as  
39 this rescues Gag oligomerisation and ensures particle assembly proceeds in the absence of NC  
40 [49]. Finally, given the enrichment of HIV buds on F-Actin structures with positive curvature,  
41 we further generated two HIV Gag Capsid mutants P<sub>99</sub>A and EE<sub>75,76</sub>AA (Fig. 4D & E), both of  
42 which inhibit Gag curvature at the PM but not high order Gag oligomerisation [50,51]. As  
43 Diaph2 cannot recruit HIV to F-Actin and depletion of Diaph2 actually enriched HIV-positive  
44 filopodia (Fig. S1), we utilised Diaph2<sup>-ve</sup> cells and simply scored the number of filopodia per  
45 cell that were HIV positive for each viral Gag mutant. Using this approach, we observed no  
46 significant difference in viral filopodia when deleting p6, the PTAP motif in p6 or NC (Fig.  
47 4F). However when using the P<sub>99</sub>A and EE<sub>75,76</sub>AA HIV capsid mutants (HIV curvature  
48 mutants), we observed Diaph2-depleted cells to not only lack any evident HIV buds at the PM  
49 but also their characteristic short filopodia. Instead, these cells resembled the lamellipodial  
50 phenotype observed in Diaph2<sup>-ve</sup>Arp2/3<sup>-ve</sup> co-depleted cells (Fig. 4G-I). This is consistent with

1 HIV Gag curvature mutants acting as dominant negatives for the Arp2/3-dependent short  
 2 filopodial pathway. To further test that HIV curvature mutants were specifically interrupting  
 3 Arp2/3 F-actin pathways and not broadly influencing all pathways that may lead to filopodial  
 4 formation (eg. Formin-induced filopodia), we infected Diaph2<sup>C/A</sup> cells with these mutants. In  
 5 this setting we observed an ability of Diaph2<sup>C/A</sup> to rescue filopodia formation (Fig. 4F; Movie  
 6 S4). Thus filopodial pools nucleated by Arp2/3 are most affected by HIV curvature mutants  
 7 and this further supports the hypothesis that HIV assembly primarily influences elements of  
 8 Arp2/3 F-Actin nucleation pathway.  
 9

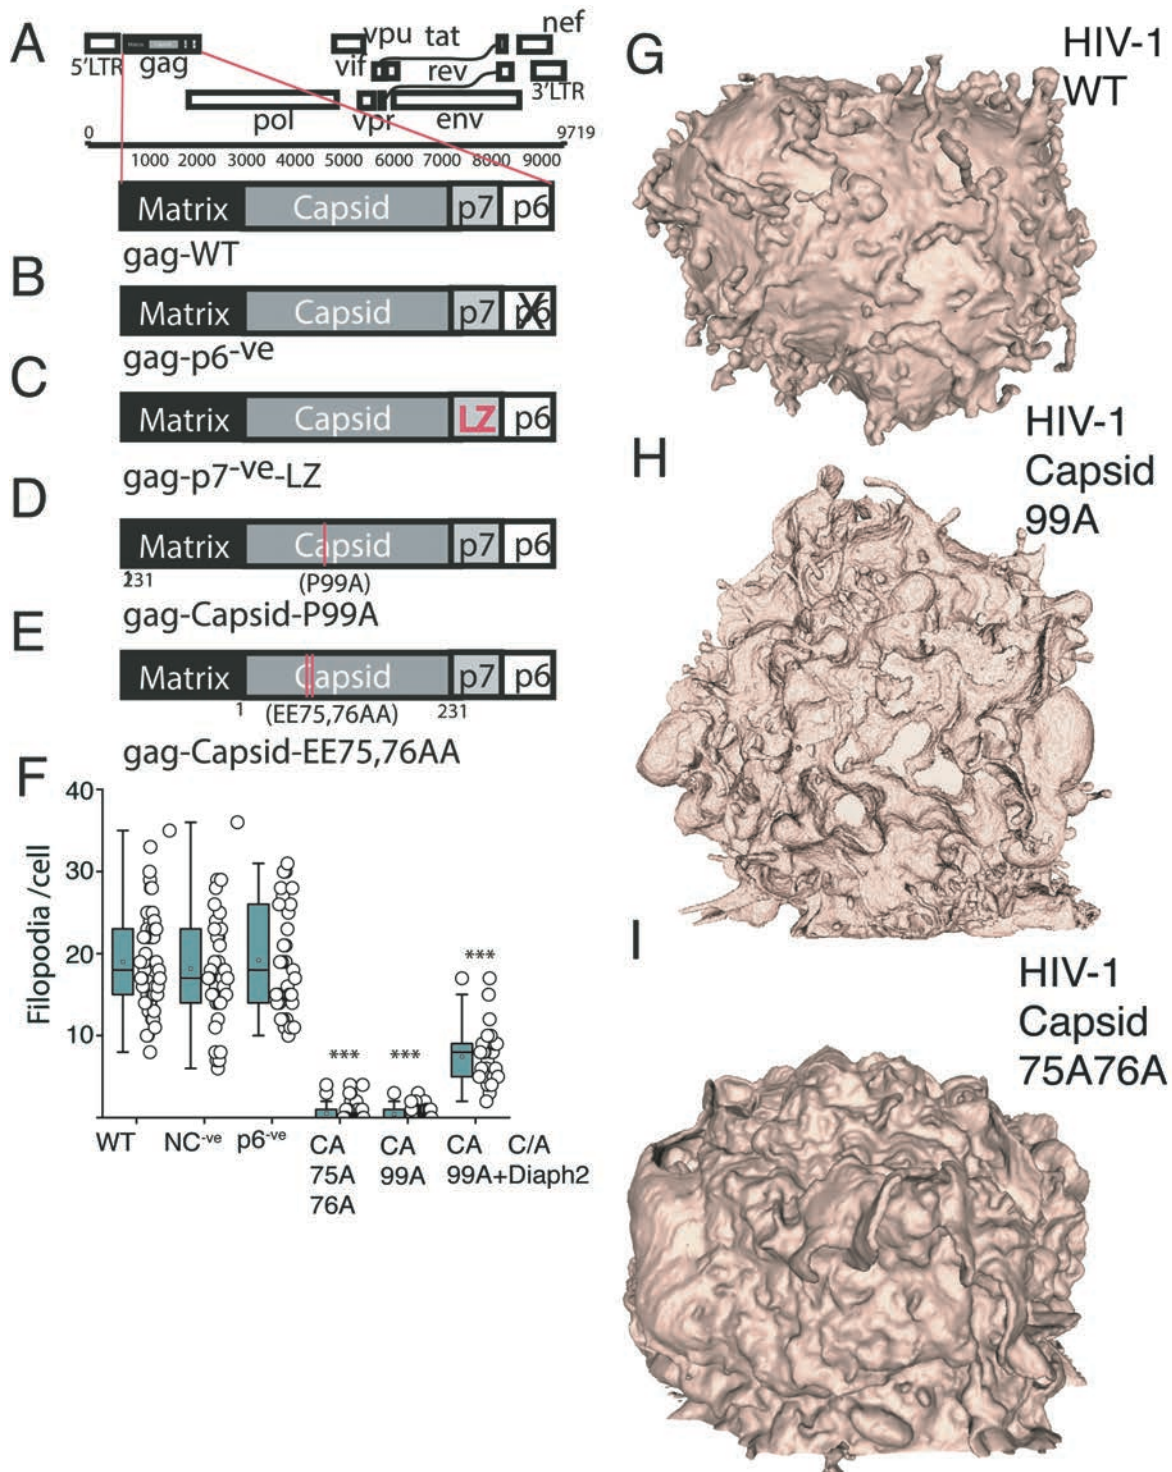

1 **Figure 4. HIV Gag curvature mutants can impact Arp2/3 dependent cortical F-Actin**

2 A-E HIV Gag mutants used. A. Wild type HIV Gag. B. HIV Gag late domain mutant with p6  
3 deleted. C. NC deletion mutant with the Leucine Zipper (LZ) derived from *Saccharomyces*  
4 *cerevisiae* GCN4 to rescue Gag oligomerisation. D&E. HIV Gag curvature mutants D. P99A  
5 and E. EE75,76AA. F. Enumeration of filopodia per cell in Diaph2<sup>-ve</sup> cell clones.  
6 \*\*\*=p<0.0001. G-H Representative FIB-SEM 3D rendered images of G. WT versus curvature  
7 mutants H. P99A and I. EE75,76AA.  
8  
9  
10  
11

12 **The HIV proteome reveals a GTPase node associated with Arp2/3 F-Actin regulation**

13 HIV has been previously observed to incorporate F-Actin, various actin nucleators and  
14 numerous upstream/downstream regulators within virions [52-56]. Thus, we turned to mass  
15 spectrometry analysis of purified virions to observe the footprint of cytoskeletal proteins that  
16 are present at HIV assembly sites. For this analysis we also leveraged the three distinct F-  
17 Actin cell types generated above (i.e. long-filopodia, extensive short filopodia and large  
18 lamellipodia) as across each cell type they shared the feature of HIV buds being enriched in  
19 positively curved F-Actin structures. Using this approach we identified several Arp2/3  
20 complex subunits, alongside two major Arp2/3 regulators, the Rho-GTPases Rac1 and Cdc42,  
21 as well as their interaction partner IQGAP1. These regulators were observed across all viral  
22 proteomes, irrespective of producer cell type (Fig.5 A&B). In addition to this F-Actin  
23 signalling node, HIV virions also acquired members of the integrin and cadherin families (Fig.  
24 5 A-B; see nodes 3 and 4, respectively). These proteins, which are involved in cell-cell  
25 adhesion, are connected to the cortical F-actin cytoskeleton both physically and via signalling  
26 pathways [57,58]. Of interest was a depletion of the cadherin node in (Fig. 5 A; node 4), as well  
27 as an increase in Arp2/3 and Cdc42 content (Fig. 5 A; node 1) in virions produced by Diaph2-  
28 deficient cells. The latter observation is not only consistent with HIV assembly preferentially  
29 proceeding alongside short Arp2/3-dependent filopodia (as observed by FIB-SEM), but also  
30 suggests that these structures are dependent on Cdc42, which is a well known filopodial  
31 regulator [10,23]. Of note, the observed decrease of Arp2/3 components in virions produced in  
32 Diaph2 and Arp2/3 co-depleted cells (Fig. 5B, node 1) is both expected and consistent with  
33 depletion of these proteins at the cellular level (Fig. S3).  
34  
35  
36  
37  
38  
39  
40  
41  
42  
43  
44  
45  
46

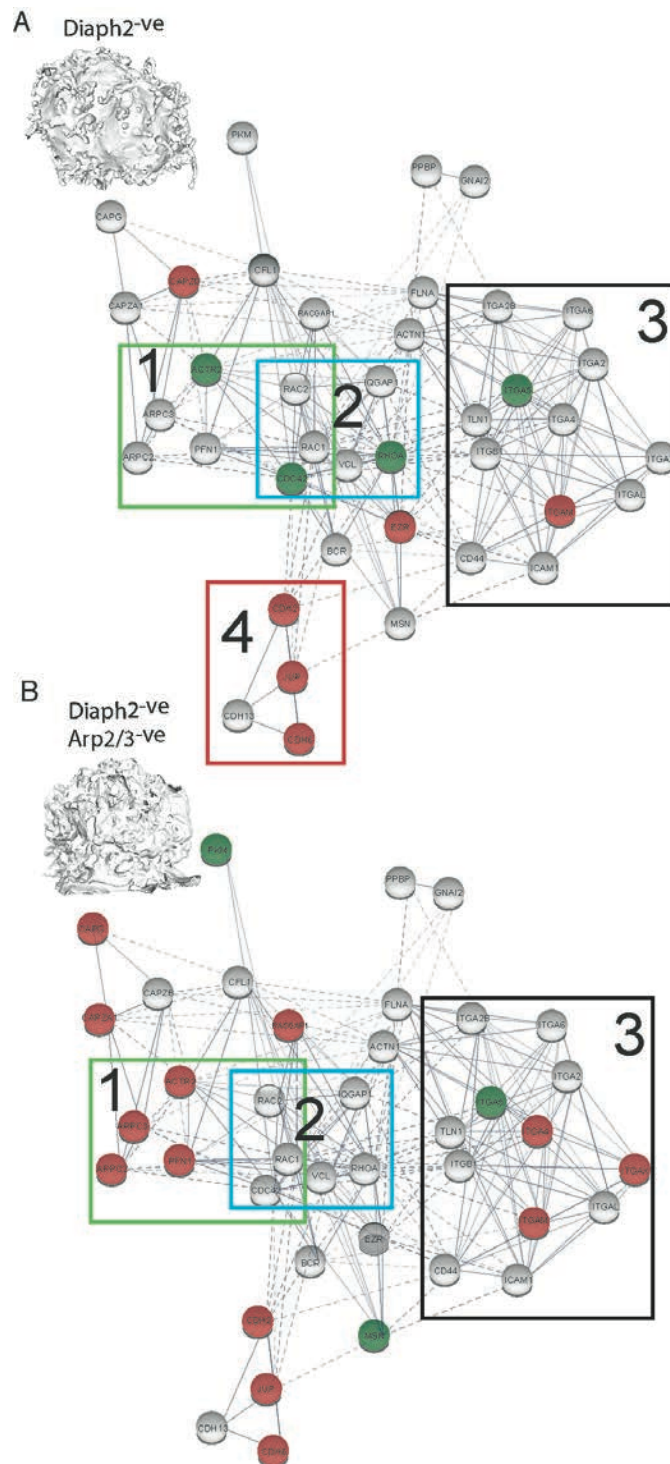

**Figure 5. Cortical F-Actin regulators enriched at the final stages of HIV egress are revealed through HIV proteomics.**

A-B Viral proteome analysis of proteins associated with cortical F-Actin regulation. Proteins with increased abundance relative to untreated cells are shown in green, whereas those with relative decreased abundance are shown in red. A. Virions produced in Diaph2<sup>-ve</sup> cells. 1. Highlights the Arp2/3 complex node where the amounts of ACTR2 and Cdc42 are increased in virion proteomes. 2. Indicates a GTPase node in association with IQGAP1. 3. Highlights a node of integrin and related proteins. 4. Highlights a node involved in cadherin adhesion that is downregulated upon Diaph2 depletion. B. Virions produced in Diaph2<sup>-ve</sup> Arp2/3<sup>-ve</sup> cells. Note that in 1. Arp2/3 components are predictably depleted compared to untreated cells, whilst in 2. the GTPase node and IQGAP1 remain unchanged.

41

42 HIV exploits the Cdc42-Arp2/3 filopodial pathway to position virus at the leading edge of cell-  
 43 cell contacts.

44 Since Cdc42 is an important regulator of Arp2/3, a master regulator of filopodia, and it was  
 45 incorporated at higher levels in virions from our Diaph2<sup>-ve</sup> cells (more abundant short  
 46 filopodia), we next targeted this protein for depletion. As a functional control, we targeted the  
 47 homologous Rho-GTPase Rac1, best known for its role in lamellipodial regulation. We also  
 48 investigated the scaffolding protein IQGAP1, which; i) is a binding partner and effector of both  
 49 Cdc42 and Rac1 [59,60], and ii) plays an increasingly recognized role in actin cytoskeleton  
 50 regulation [61,62], and iii) was consistently incorporated in virions in our experiments (Fig.5).

1 While we succeeded in generating a viable Cdc42 homozygous knockout cell line using  
2 CRISPR/Cas9 (Fig. S4). Attempts at knocking out Rac1 led to multinucleated cell populations  
3 with reduced viability, which is consistent with previous reports of Rac1 being an essential  
4 gene [63,64]. To circumvent this, we partially depleted Rac1 by shRNA, and also generated a  
5 Wave2<sup>k/o</sup> cell line (Fig. S4), since Wave2 is the main downstream effector of Rac1 in F-actin  
6 regulation [65,66]. While obtaining homozygous IQGAP1 knockout clones via CRISPR-Cas9  
7 proved challenging, we were able to establish a line stringently depleted of IQGAP1 using  
8 shRNA (>99% depletion at the protein level, Fig. S3).

9  
10 Initial Rac1 depletion via shRNA, revealed a greater frequency of filopodia in infected cells  
11 and secondly the generation of significantly longer and thicker filopodia when cells were  
12 infected (Fig. 6B vs A). Similarly, WAVE2<sup>k/o</sup> cells infected with HIV had greater propensity  
13 to form filopodia (two-fold), and these were significantly longer and thicker compared to WT  
14 cells (Fig. 6C vs A and Fig. S2), but also uninfected WAVE2<sup>k/o</sup> cells (Fig. S2). Together these  
15 observations suggest that HIV infection stimulates a pathway of filopodial formation that is  
16 unchecked in Rac1<sup>-ve</sup> and WAVE2<sup>k/o</sup> cells, where the lamellipodial F-actin arm is disabled.  
17 Given the known role of Cdc42 in filopodia formation and its competing nature with the Rac1  
18 pathway, we turned our attention to this Rho-GTPase. Importantly, Cdc42<sup>k/o</sup> cells were devoid  
19 of filopodia and coalesced cortical F-Actin into prominent lamellipodia, with no evident  
20 influence on F-actin when cells were HIV infected (Fig. 6D). Since IQGAP1 has been  
21 previously reported to articulate Cdc42 signaling to the cytoskeleton [62], we also assessed the  
22 role of this regulator in the filopodial context. IQGAP1-deficient cells displayed a collapse in  
23 filopodial lengths (Fig. 6E), with maintenance of HIV at the leading edge of remaining  
24 filopodia, similar to that observed in Diaph2-depleted cells. We therefore conclude that  
25 IQGAP1 can influence filopodial networks but, like Diaph2, is not required for the seeding of  
26 filopodia. To summarize our combined observations from mass spectrometry, gene silencing  
27 and high-resolution imaging, reveal that HIV infection augments a pathway of filopodia  
28 formation, and this is most evident when the lamellipodial regulators are inactivated. In  
29 contrast, removing Cdc42 completely blocked filopodia formation in a manner similar to  
30 Arp2/3 and Diaph2 co-depletion, whereas depletion of IQGAP1 or Diaph2 led to shorter  
31 filopodia. Together, our data indicates that HIV-assembly hijacks a cellular pathway that is  
32 dependent on Cdc42-Arp2/3 F-actin nucleation for filopodial seeding and IQGAP1/Diaph2 for  
33 filopodial elongation, in order to position itself at the tips of filopodia.

34

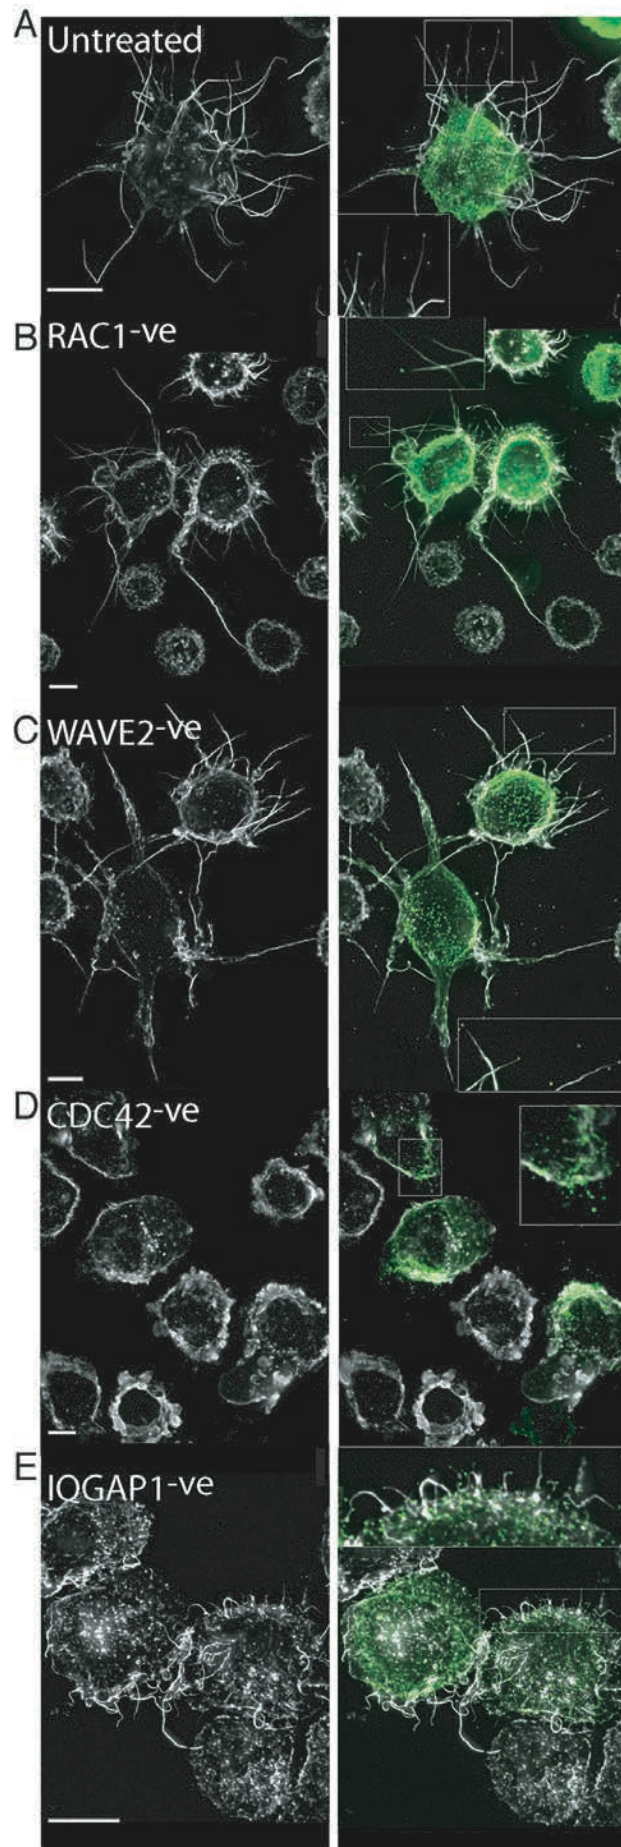

**Figure 6. HIV infection and its influence on cortical F-Actin.**

A. From viral proteomics, we identified a common node of actin regulators associated with Arp2/3-dependent filopodia and lamellipodia. Through shRNA depletion or CRISPR-Cas9 knockout, we generated clonal cell populations depleted of various actin regulators. B-C Lamellipodial regulators. B. *Rac1*<sup>-ve</sup> and C. *WAVE2*<sup>k/o</sup>. D. *Cdc42*<sup>k/o</sup> (filopodial regulator). E. *IQGAP1*<sup>-ve</sup>. A. Represents the untreated control. All cells were infected with HIV iGFP (green) and then counterstained with phalloidin Alexa-647 (white). All scale bars are at 5 $\mu$ m. Inset magnifications reveal HIV at the leading edge of filopodial structures. Note in *Rac1*<sup>-ve</sup> and *WAVE2*<sup>k/o</sup> images the extensive filopodial networks only present in HIV infected (green) cells (see Fig. S2 for formal quantification).

1 HIV cell-cell transfer is dependent on an intact Cdc42-IQGAP1-Arp2/3 pathway

2 Given the continuum of phenotypes observed in our abovementioned observations, we tested  
3 their impact on the late stages of the viral life cycle in the context of viral spread. For free virus  
4 release, we enumerated HIV particles accumulating in the supernatant as a measure of budding.  
5 As HIV spread can also proceed through direct cell-cell contacts, we further tested the ability  
6 of HIV to spread cell to cell by coincubating infected donor cells with permissive target cells.  
7 Using these approaches, we could determine if the generic lack of a cortical F-Actin structure  
8 or a specific F-Actin pathway is essential for HIV budding and/or cell-cell transfer.

9

10 Disruption of either the Rac1-WAVE2 pathway (lamellipodia) or Cdc42-IQGAP1 pathway  
11 (filopodia) both impaired free HIV budding, as indicated by significantly lower viral particle  
12 counts in the supernatant from cells depleted of these regulators, compared to untreated cells  
13 (Fig. 7 B). However, impaired release of free HIV did not predict outcomes for cell-cell HIV  
14 transfer. For cells with disabled Rac1/WAVE2 (Rac1<sup>-ve</sup>, Wave2<sup>k/o</sup> cells) cell-cell HIV transfer  
15 persisted (Fig. 7 A&B), despite the decreased free virus budding ability. In contrast, disruption  
16 of the Cdc42/IQGAP1 axis (Cdc42<sup>k/o</sup> and IQGAP1<sup>-ve</sup> cells) impacted both HIV budding and  
17 cell-cell transfer (Fig. 7 A&B). These observations suggest that while normal actin dynamics  
18 are important for free virus release, Cdc42 and IQGAP1 are specifically required for cell-cell  
19 HIV transfer, whereas Rac1/Wave2 are not. To further test this hypothesis in the setting of  
20 primary CD4 T cell targets, we focussed cell-cell transfer assays with disruption of the Rac1-  
21 WAVE2 pathway versus disruption of Cdc42-IQGAP1. In this setting, we further tested the  
22 efficiency of cell-cell spread by limiting dilution of the infected donors into primary CD4 T  
23 cell co-cultures. Using this approach, we observed almost complete loss of cell-cell HIV  
24 transfer in Cdc42<sup>k/o</sup> and IQGAP1<sup>-ve</sup> clones, whereas cell-cell transfer persisted in Rac1<sup>-ve</sup>,  
25 Wave2<sup>k/o</sup> clones, albeit slightly lower than in WT cells (Fig. 7C). In cells lacking filopodia  
26 (CDC42 and IQGAP1), one immediate mechanism for lack of viral transfer could be the  
27 culmination of a limited contact capacity with the cells immediate microenvironment. To test  
28 this hypothesis, we enumerated accumulative cell to cell contacts (Fig. 7D) and later target cell  
29 engagement (Fig. 7E) in wild type, IQGAP1<sup>-ve</sup> and WAVE2<sup>k/o</sup> cells. IQGAP1<sup>-ve</sup> cells were  
30 observed to have significantly lower overall contacts and also engaged fewer cell targets.  
31 Whilst this addresses the lowered ability of cells without filopodia to participate in cell-cell  
32 transfer, it does not address the paradox of persistent cell-cell HIV transfer, despite  
33 reduced viral budding in cells with augmented filopodia. To observe this latter phenotype we  
34 turned to live imaging of HIV infected Wave2<sup>k/o</sup> clones to observe F-Actin dynamics during  
35 viral transfer. As expected, HIV infected Wave2<sup>k/o</sup> clones displayed extensive and dynamic  
36 filopodial networks (Movies S5 & S6). Donor-target cell interactions were often guided by  
37 filopodial activity. In IQGAP1<sup>-ve</sup> cells we observed a distinct lack of this filopodial guiding  
38 and this led to significantly lower cell-cell contacts and subsequent conjugate formation, when  
39 compared to filopodially active wild type and WAVE2<sup>k/o</sup> cells (Fig. 7D & E). Whilst this  
40 mechanistically can explain a lack of cell-cell transfer in IQGAP1<sup>-ve</sup> cells, it does not explain  
41 how in cells enriched with HIV filopodia, where HIV budding is arrested (WAVE2<sup>k/o</sup> cells),  
42 viral infection can proceed if cell-cell contact are made. To resolved this further, we observed  
43 later interactions WAVE2<sup>k/o</sup> cells where filopodial networks are augmented following HIV  
44 infection. Filopodia initially persisted in early cell-cell conjugates, yet we routinely observed  
45 collapse of filopodial networks immediately preceding VS formation and HIV-GFP transfer  
46 to the opposing target cell (Fig. 7 F and Movie S6). As a surrogate of filopodial activity, we  
47 quantified this as membrane complexity through calculation of cellular circularity. In this  
48 setting, cells with extensive filopodial networks were observed to have low circularity, whilst  
49 cells with no filopodial activity were observed to have high score in circularity. Measurements  
50 of Gag-polarisation over time then established measurements of the seeding of the VS and

1 release of GFP into the neighbouring target was used to mark the final stage of VS maturation  
 2 that culminated in viral transfer. Using this quantification in the live cell movie acquisitions (7  
 3 F & G), we observe cells engaged in cell-cell contact to approach a circularity of 1 (i.e. Cells  
 4 collapsing their filopodial networks) just prior to the final stages of viral transfer, as marked  
 5 initially by Gag polarisation and then subsequently observed in cytoplasmic transfer to the  
 6 neighbouring cell (7G).  
 7

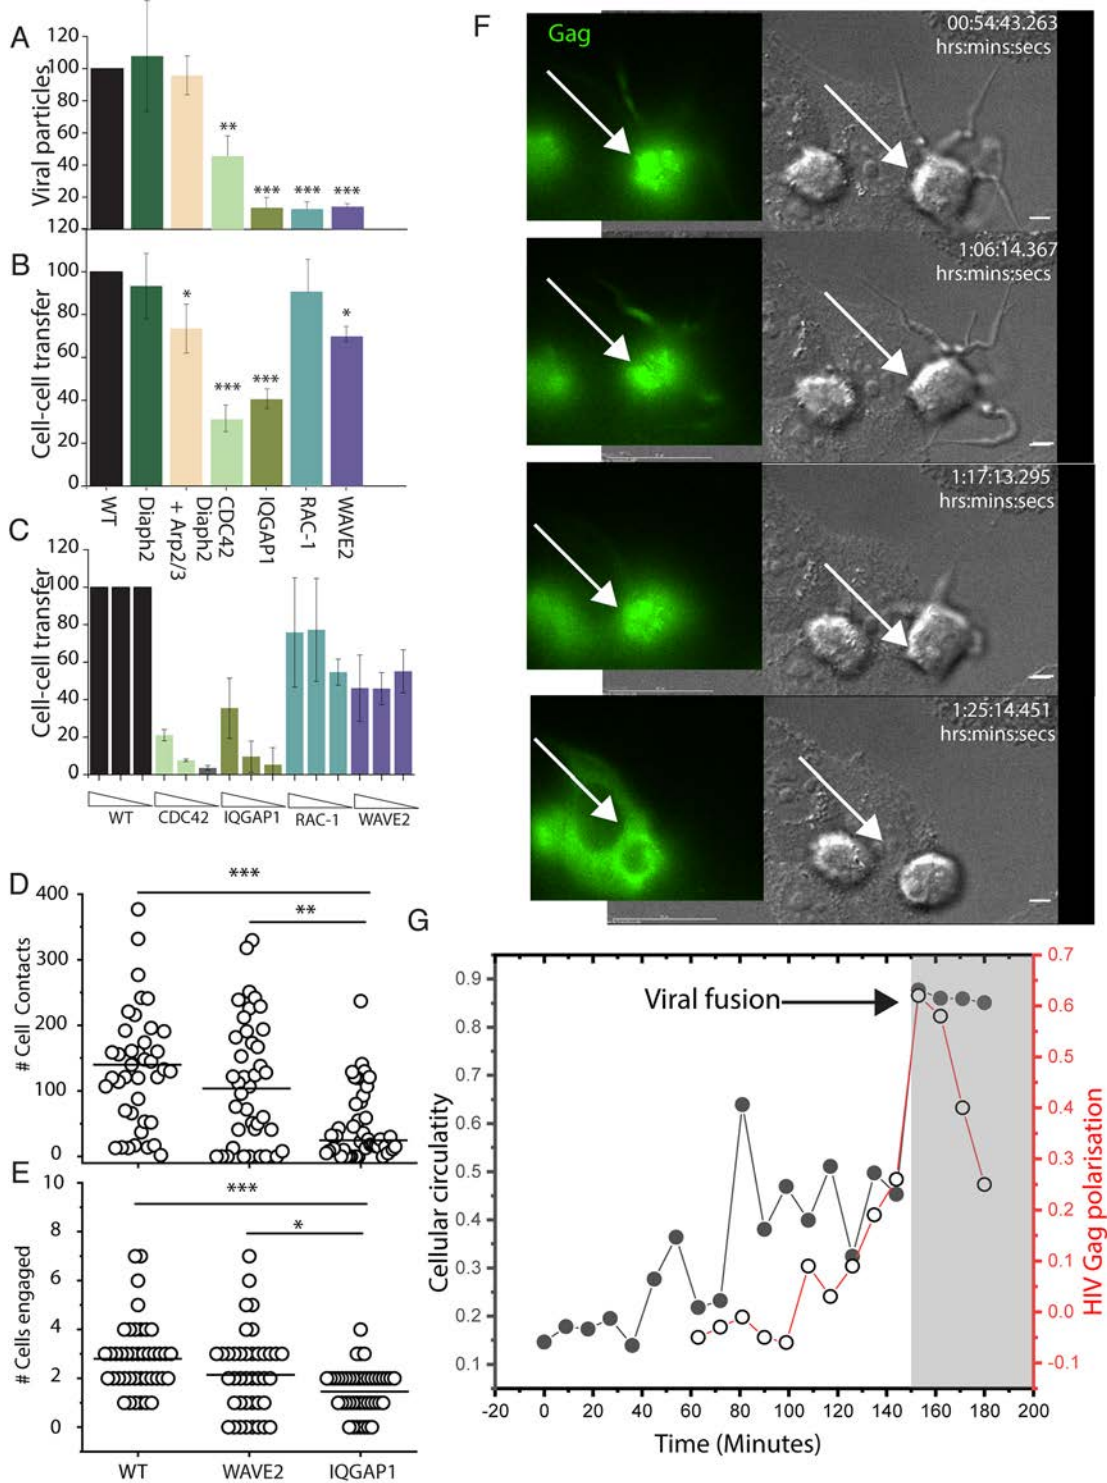

8  
 9  
 10

**Figure 7. HIV spread is dependent on Cdc42 and IQGAP1**



1 A. All cells are infected with pHIVNL43iGFP and normalised to 5% infection on day 3. After  
2 normalisation, cell supernatants are collected over a 24 hour period and GFP positive HIV  
3 particles are spinoculated onto 96-well glass plates coated with poly-L-lysine. Absolute viral  
4 particle counts are determined by high-resolution fluorescence microscopy per 4 fields of  
5 view. Herein the data is presented as a relative count [(virion count/virion count in  
6 WT control)\*100]. B. HIV infected cells as normalised in A. are then co-cultured at a ratio of  
7 1:5 with HIV-permissive TZMB1 targets. C. Infected cells are co-cultured with primary CD4  
8 target T-cells at limiting dilutions. Dilution steps correspond to 5%, 1% and 0.2% infected cells  
9 in the donor population. Exposure to virus from infected cells is limited to 24 hours, after  
10 which an entry inhibitor BMS806 is added to prevent further viral spread. A-C. Data indicates  
11 the mean and standard deviation from 3 independent experiments. In C, primary recipient CD4  
12 T cells were sourced from independent blood donors. D) The cumulative number of contacts  
13 between each infected donor cell and any uninfected target cells (TZM-bl) over 3 hours. E)  
14 same as D but only the first contact with each distinct target cell is counted. F) Representative  
15 example of a time-lapse series from D-E. Cells are infected with HIViGFP, allowing real-time  
16 visualization of Gag. G) At the virological synapse, donor-cell circularity was used to  
17 enumerate lack of membrane protrusions (ie. Lack of filopodia) in parallel with Gag  
18 polarization. In grey shading are the time points where GFP cytoplasmic transfer (ie. Viral  
19 fusion) is observed. \*  $p < 0.01$ , \*\*  $p < 0.001$ , \*\*\*  $p < 0.0001$ .

20

21 To conclude, in regard to F-Actin-dependent HIV spread we make two important observations.  
22 Firstly, whilst viral budding is sensitive to depletion of the Arp2/3 regulators Rac1/WAVE2  
23 and Cdc42/IQGAP1, cell-cell spread is primarily dependent on Cdc42/IQGAP1. Whilst this  
24 may be dependent on limited HIV filopodial activity decreasing cell-cell contacts, we cannot  
25 rule out additional viral blocks at the VS if IQGAP1 is removed. Secondly, although HIV  
26 manipulates and enhances Cdc42/IQGAP1-dependent filopodia, which help mediate early  
27 donor-target cell contacts, Cdc42 may be inactivated at later stages of cell-cell HIV transfer,  
28 as suggested by collapse of filopodial networks during VS progression that culminates in viral  
29 delivery.

30

31

32

33

## 1 Discussion

2  
3 The corruption of cortical F-Actin by HIV has remained elusive, with evidence both for and  
4 against its role in budding and cell-cell viral spread [16,20,33,67]. Through systematic depletion  
5 of various F-Actin regulators, combined with viral mutagenesis and high-resolution imaging,  
6 we were able to illuminate the intersection of HIV egress with cortical F-Actin and conclude  
7 this is primarily associated with the Cdc42-IQGAP1-Arp2/3 pathway.

8  
9 Our primary aim herein was to understand how HIV egress was spatiotemporally connected to  
10 a continuum of cortical F-actin structures that dynamically regulated in leukocytes. Whilst  
11 many prior studies have mapped F-Actin pathways in cell-free systems, the challenge herein  
12 was to map F-Actin pathways and how they influenced not only the live virus, but also in a  
13 cellular & cytoskeletal setting that was consistent with that of the immune system. Whilst  
14 many F-Actin regulators are common across cells, F-Actin regulation in leukocytes is unique  
15 and enables a rapidly changing canvas of F-Actin polymers to coordinate their roles in the  
16 immune response. Processes such as chemotaxis, promiscuous cell-cell scanning and later  
17 stable cell-cell contacts that mediate downstream immune responses through immunological  
18 synapses are all processes dependent on dynamic cortical F-Actin. So in discussion of the how  
19 F-Actin influences HIV egress, we need to emphasise that firstly this needs to be focussed on  
20 cells of hemopoietic lineage and secondly that each F-Actin pathway appears temporally and as  
21 such we need to frame each pathway when it dominates to observe how it would influence HIV  
22 at that specific point in time. In discussion we will address this at two levels. Firstly, HIV's  
23 time at the leading edge of protruding F-Actin structures, when cells explore their immediate  
24 environments. Secondly, when infected cells select and engage in longer stable contacts.

25  
26 In exploiting the power of FIB-SEM imaging, we observed HIV buds to be enriched to the  
27 leading edge of the PM where cortical F-actin structures induce strong positive curvature.  
28 However, curvature and/or formin activity alone were not sufficient to position HIV at the tips  
29 of filopodia. Thus, other actin regulators associated with membrane curvature must be  
30 involved. Our observations herein that HIV infection specifically enhances Cdc42-Arp2/3-  
31 dependent filopodia, supports a mechanism of action that corrupts this pathway of actin  
32 nucleation. While it is conceivable that the curvature provided by HIV during budding could  
33 itself drive filopodia formation (e.g by direct recruitment/activation of Cdc42/Arp2/3 [68,69],  
34 we deem more likely that the virus hijacks a pre-existing cellular pathway that is dependent on  
35 curvature and that involves these regulators. We base this reasoning three-fold. Firstly on  
36 uninfected myeloid cells there are similar long filopodia (albeit uncapped with HIV). Secondly  
37 most filopodia in infected cells are HIV-capped [18]. If HIV would provide an independent  
38 mechanism of filopodia formation, both structures would be expected to coexist, whereas in  
39 reality HIV-capped filopodia in infected cells predominate. Thirdly and finally, HIV curvature  
40 mutants had a dominant negative effect on all filopodia, indicating i) a functional overlap of  
41 the viral and cellular pathways of filopodia formation, and ii) a critical role of Gag in hijacking  
42 of these structures. Whilst our work herein was in review, Sabo and colleagues observed HIV  
43 Gag to directly interact with IQGAP1 [70]. This observation is consistent with our observations  
44 herein at several levels. Firstly, as IQGAP1 binds to Cdc42 and stabilizes it in its active  
45 conformation to drive filopodia formation [62]. Secondly, as IQGAP1 also facilitates assembly  
46 of multiprotein complexes that spatially link Cdc42, Arp2/3 and formins [61,71,72]. This late  
47 complex is consistent with how HIV is associated with a filopodial structure that is firstly  
48 nucleated by CDC42, but secondly elongated by the formin Diaph2. Finally, given the role of  
49 positive curvature in filopodia biogenesis, consumption of IQGAP1 by HIV Gag into an area  
50 of neutral curvature, is entirely consistent with HIV Gag curvature mutants acting as dominant

1 negative constructs for CDC42-Arp2/3 driven filopodia. Whilst the resolution of the multi-  
2 layered viral and cellular pathways that gives birth to HIV filopodia are now becoming clearer,  
3 the role of this hybrid viral and cellular structure now needs discussion. In many other  
4 enveloped viruses, filopodia have been associated with the ability to mediate cell-cell viral  
5 transfer [73-77]. Yet, this latter concept is at odds at our observations of viral egress. In many  
6 settings where F-Actin regulation is significantly perturbed by the presence of high cortical F-  
7 Actin concentrations in either extensive lamellipodial or filopodial pools, so to is viral egress.  
8 The most evident is when HIV filopodial networks are formed during Rac1 and Wave2  
9 depletion. In that setting, the removal of Rac1 would not only bias signalling to CDC42, but  
10 with IQGAP1 recruited by HIV Gag, CDC42 would be maintained in an active GTP bound  
11 state [78]. This is entirely consistent with its role in filopodial formation but also its  
12 augmentation by HIV Gag-IQGAP1 during infection. Whilst arrest of viral HIV buds in a F-  
13 Actin structure may be a simple function of distance that this structure projects immature HIV  
14 from the plasma membrane, the role of the virus in this setting is seems counter intuitive, as a  
15 virus that cannot undergo abscission at the membrane cannot subsequently mature [79] and as  
16 such this cannot directly contribute to viral spread. Yet in this setting, we hypothesise leading  
17 edge structures positive with HIV can indeed indirectly contribute to cell-cell spread. For  
18 instance, we have previously observed HIV-Filopodia to mediate hundreds of contacts per hour  
19 between relevant primary HIV target cells, with filopodial activity often preceding VS  
20 formation [18]. The latter is in agreement with previous observations that filopodia and/or  
21 dendrites may commonly serve as precursors for biological synapses [80-84]. So in this setting,  
22 the virus at the leading edge of protruding F-Actin structures may indeed be hard-wired to  
23 coordinate the initial pre-synaptic contacts. Whilst these HIV buds would be sacrificed during  
24 this process, a secondary wave of budding (from another pool of HIV Gag) would proceed  
25 once stable cell-cell contacts matured. So to conclude, HIV's time in this setting is focussed at  
26 the leading edge of a cell contacting its surrounding environment. Release of virus is lowered,  
27 increasing the half life of HIV's corruption of the leading edge to enable initial cell-cell  
28 contacts. This is consistent with our observations herein where cells with intact CDC42 and  
29 IQGAP1 expression mediating greater numbers of contacts that lead to a greater number of  
30 committed cell-cell engagements in live cell cultures (this model is now visually summarised  
31 in Fig. 8A) and result in the transfer of viral infection.

32 Now lets consider the second stage of viral transfer and the regulation required to close cell to  
33 cell contacts and final release of the virus for infection across the synaptic cleft. In contrast, we  
34 observed cell-cell spread of HIV to be primarily dependent on Cdc42 and IQGAP1 but showed  
35 tolerance to depletion of Rac1/Wave2, despite a similar impact of all regulators on free virus  
36 budding. Whilst the generation of a F-Actin structure driven by CDC42 and IQGAP1 can  
37 dictate early cell-cell contacts, their subsequent role during the maturation of the VS is  
38 potentially temporally and mechanistically complex. This complexity is directly a consequence  
39 of the role of IQGAP1 in many cellular events, including scaffolding proteins during cell-cell  
40 adhesion[85,86], the potential influence on abscission pathways by directly binding to TSG101  
41 [87], and its abovementioned role in Arp2/3 F-Actin polymerisation [88]. Whilst complex, the  
42 maturation and function of the VS requires all of the above events and we hypothesise IQGAP1  
43 provides the scaffolding center that enables coordinated cell-cell adhesion and F-Actin  
44 polymerisation in a manner that facilitates viral budding/"release" into the synapse.  
45 Mechanistically, the maturation of the immunological synapse (IS) proceeds in a similar  
46 manner to the viral synapse (VS). In both structures a supramolecular activation cluster forms  
47 (SMAC) at the contact site between cells. At the center of the SMAC (cSMAC), clearance  
48 of F-Actin proceeds alongside IQGAP1 [89-91], where they both coalesce to a peripheral ring  
49 of F-Actin (pSMAC and dSMAC) alongside such as ICAM1 [91]. In this setting F-Actin

1 remodelling at the IS is driven by CDC42 [90]. In addition, the abscission machinery  
2 TSG101 is retained and is essential not only for the development of the cSMAC but also for  
3 subsequent abscission events that liberate vesicles at the IS [92]. At the molecular level  
4 vesicle secretion is dictated by the the switching roles of CDC42 and IQGAP1, as the  
5 partnering of these two proteins in their F-Actin stimulatory form, active GTP-CDC42 bound  
6 to the C-Terminus of IQGAP1, inhibits exocytosis/ vesicle secretion [93]. Based on our  
7 observations herein, we would support a similar model for CDC42-IQGAP1 at the VS,  
8 where initial adhesive events mature into a structure that favours the release of HIV at the  
9 cSMAC. In support of this, as in exocytosis inhibition, F-Actin active GTP-CDC42-IQGAP1  
10 complexes we observe also observe to arrest viral release. To conclude, HIV's relationship  
11 with F-Actin is indeed complex and the role of F-Actin regulation in HIV spread requires  
12 appreciation of time and space for an infected cell.

13 Shadowing and highjacking the Cdc42-IQGAP1-Arp2/3 actin regulatory axis is not a unique  
14 feature of HIV. Nascent viral buds have also been observed at the tips of filopodia-like  
15 structures for other types of viruses [94-99], and numerous intracellular pathogens are known to  
16 exploit Rho-GTPases and the unique ability of the Arp2/3 complex to promote formation of  
17 specialized cortical F-actin membrane protrusions that facilitate cell-cell infection spread [100-  
18 104]. Similarly, IQGAP1 is a prominent target of microbial manipulation and this is closely  
19 related to its ability to modulate the actin cytoskeleton (reviewed in [105]). Several viruses bind  
20 IQGAP1 either directly (via interactions with the viral matrix protein) or indirectly (via  
21 common binding partners) and this has important consequences for viral assembly, budding  
22 and/or pathogenesis [21,96,106-109]. For HIV, recent studies by Sabo and colleagues [70], have  
23 observed biochemically IQGAP1 interactions with NC & p6 elements of HIV Gag. In this  
24 study they support a role for IQGAP1 in negative regulation of HIV Gag trafficking and  
25 subsequent HIV-budding [70]. Whilst our observations readily support a role for IQGAP1 in  
26 influencing HIV budding, we did not observe this to be a consequence of negative regulation  
27 of Gag trafficking and docking to the membrane. For instance near complete removal of  
28 IQGAP1 did not increase viral budding and egress, but rather led to inhibition thereof. In light  
29 of our observations herein and those recently published whilst our study was in review [70], we  
30 would conclude that as IQGAP1 is a scaffolding protein with many binding partners, it is not  
31 surprising that HIV Gag has many different fates depending on each cell type it is expressed in  
32 and what functions that cell type maybe engaged over the time the cells were sampled.  
33 Importantly, we do readily support a role for IQGAP1 in the viral life cycle and this readily  
34 supports recent observations by this team.

35  
36  
37 Overall, we propose that HIV has evolved to highjack a specific node of F-actin regulation that  
38 positions outgoing virus at the leading edge of cortical F-actin structures. Since filopodia play  
39 an important role in scanning of the microenvironment and mediating immune cell interactions,  
40 their corruption is beneficial to the virus because it biases the first line of cell-cell contacts  
41 towards HIV spread, e.g. by providing enhanced adhesion and specificity to CD4+ target cells.  
42 However, as these contacts form and the VS matures, the relationship of HIV with F-Actin  
43 must change to enable viral release. We conclude that manipulation of the Cdc42-IQGAP1-  
44 Arp2/3 actin regulatory node is essential for corruption of cellular filopodia to facilitate cell-  
45 cell HIV spread, and propose a key role for IQGAP1 in integrating signals of F-actin regulation  
46 and viral abscission to strategically enhance HIV egress at sites of productive cell-cell contact.  
47 Moving forward, greater spatiotemporal resolution of this final release event is needed and will  
48 give further insight into why many pathogens like HIV have evolved to interact with IQGAP1  
49 and its binding partners.

1

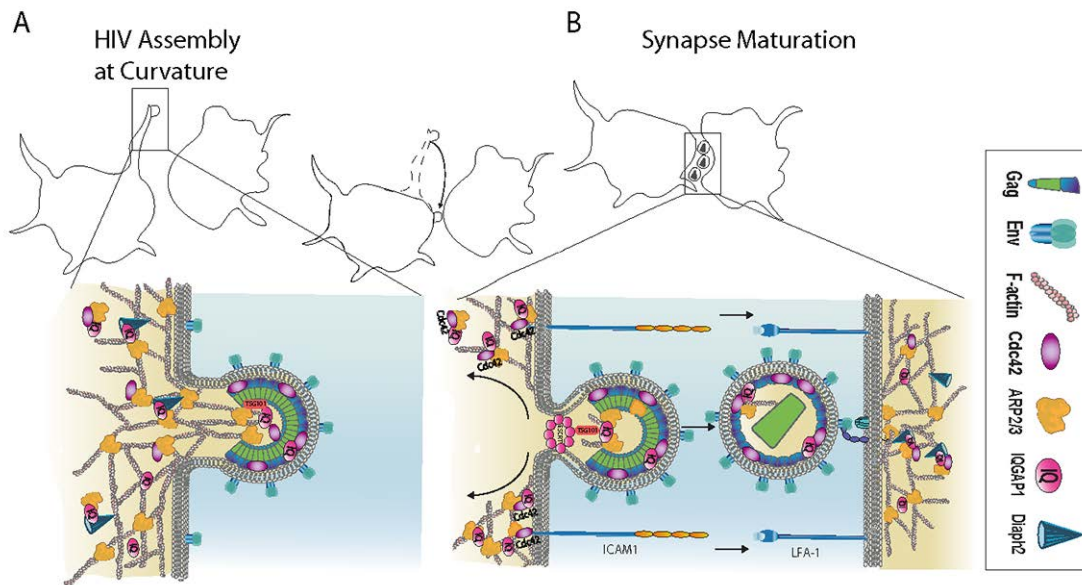

2  
3

4 **Figure 8. Proposed model of spatio-temporal regulation of F-Actin during HIV egress.**

5 A. With probing and tethering activity corrupted by HIV buds, the F-actin structures at this  
6 phase enable pre-synaptic events (cell contacts and initial adhesion). B. Following cell-cell  
7 engagement, the viral synapse matures. This leads to two important outcomes. Firstly, similar  
8 to that observed at the immunological synapse [90] Cdc42-F-Actin activity is altered and  
9 transitions from filopodial biogenesis to cell-cell adhesion required for HIV release (as  
10 observed when cells collapse filopodia just prior to HIV fusion). During this change we  
11 hypothesise IQGAP1 being directly involved through providing a scaffolding center needed  
12 temporally coordinate binding not only to HIV Gag, but also providing feedback to other  
13 binding partners including Cdc42 and TSG101. Whilst the observations herein and recently by  
14 others [70], initially supports this model, future work will be key in understanding the switching  
15 nature of IQGAP1 and how F-Actin and CDC42 influences its role in the final stages of viral  
16 abscission and transfer.

17

1   References

- 2
- 3   1.    Leavitt, J.; Leavitt, A.; Attallah, A.M. Dissimilar modes of expression of beta- and  
4       gamma-actin in normal and leukemic human T lymphocytes. *The Journal of biological*  
5       *chemistry* **1980**, *255*, 4984-4987.
- 6   2.    Huppa, J.B.; Davis, M.M. T-cell-antigen recognition and the immunological synapse.  
7       *Nature reviews. Immunology* **2003**, *3*, 973-983, doi:10.1038/nri1245.
- 8   3.    Grakoui, A.; Bromley, S.K.; Sumen, C.; Davis, M.M.; Shaw, A.S.; Allen, P.M.; Dustin,  
9       M.L. The immunological synapse: a molecular machine controlling T cell activation.  
10       *Science (New York, N.Y.)* **1999**, *285*, 221-227, doi:10.1126/science.285.5425.221.
- 11 4.    Chesarone, M.A.; Goode, B.L. Actin nucleation and elongation factors: mechanisms  
12       and interplay. *Current opinion in cell biology* **2009**, *21*, 28-37,  
13       doi:10.1016/j.ceb.2008.12.001.
- 14 5.    Campellone, K.G.; Welch, M.D. A nucleator arms race: cellular control of actin  
15       assembly. *Nature reviews. Molecular cell biology* **2010**, *11*, 237-251,  
16       doi:10.1038/nrm2867.
- 17 6.    Egile, C.; Rouiller, I.; Xu, X.P.; Volkman, N.; Li, R.; Hanein, D. Mechanism of  
18       filament nucleation and branch stability revealed by the structure of the Arp2/3 complex  
19       at actin branch junctions. *PLoS biology* **2005**, *3*, e383,  
20       doi:10.1371/journal.pbio.0030383.
- 21 7.    Robinson, R.C.; Turbedsky, K.; Kaiser, D.A.; Marchand, J.B.; Higgs, H.N.; Choe, S.;  
22       Pollard, T.D. Crystal structure of Arp2/3 complex. *Science (New York, N.Y.)* **2001**, *294*,  
23       1679-1684, doi:10.1126/science.1066333.
- 24 8.    Chesarone, M.A.; DuPage, A.G.; Goode, B.L. Unleashing formins to remodel the actin  
25       and microtubule cytoskeletons. *Nature reviews. Molecular cell biology* **2010**, *11*, 62-  
26       74, doi:10.1038/nrm2816.
- 27 9.    Aspenstrom, P. The Intrinsic GDP/GTP Exchange Activities of Cdc42 and Rac1 Are  
28       Critical Determinants for Their Specific Effects on Mobilization of the Actin Filament  
29       System. *Cells* **2019**, *8*, doi:10.3390/cells8070759.
- 30 10.   Nobes, C.D.; Hall, A. Rho, rac, and cdc42 GTPases regulate the assembly of  
31       multimolecular focal complexes associated with actin stress fibers, lamellipodia, and  
32       filopodia. *Cell* **1995**, *81*, 53-62, doi:10.1016/0092-8674(95)90370-4.
- 33 11.   Lifson, J.D.; Feinberg, M.B.; Reyes, G.R.; Rabin, L.; Banapour, B.; Chakrabarti, S.;  
34       Moss, B.; Wong-Staal, F.; Steimer, K.S.; Engleman, E.G. Induction of CD4-dependent  
35       cell fusion by the HTLV-III/LAV envelope glycoprotein. *Nature* **1986**, *323*, 725-728,  
36       doi:10.1038/323725a0.
- 37 12.   Phillips, D.M.; Bourinbaiar, A.S. Mechanism of HIV spread from lymphocytes to  
38       epithelia. *Virology* **1992**, *186*, 261-273, doi:10.1016/0042-6822(92)90080-9.
- 39 13.   Jolly, C.; Kashefi, K.; Hollinshead, M.; Sattentau, Q.J. HIV-1 cell to cell transfer across  
40       an Env-induced, actin-dependent synapse. *The Journal of experimental medicine* **2004**,  
41       *199*, 283-293, doi:10.1084/jem.20030648.
- 42 14.   Sundquist, W.I.; Krausslich, H.G. HIV-1 assembly, budding, and maturation. *Cold*  
43       *Spring Harbor perspectives in medicine* **2012**, *2*, a006924,  
44       doi:10.1101/cshperspect.a006924.
- 45 15.   Garrus, J.E.; von Schwedler, U.K.; Pornillos, O.W.; Morham, S.G.; Zavitz, K.H.;  
46       Wang, H.E.; Wettstein, D.A.; Stray, K.M.; Cote, M.; Rich, R.L., et al. Tsg101 and the  
47       vacuolar protein sorting pathway are essential for HIV-1 budding. *Cell* **2001**, *107*, 55-  
48       65, doi:10.1016/s0092-8674(01)00506-2.

- 1 16. Gladnikoff, M.; Shimoni, E.; Gov, N.S.; Rousso, I. Retroviral assembly and budding  
2 occur through an actin-driven mechanism. *Biophysical journal* **2009**, *97*, 2419-2428,  
3 doi:10.1016/j.bpj.2009.08.016.
- 4 17. Carlson, L.A.; de Marco, A.; Oberwinkler, H.; Habermann, A.; Briggs, J.A.;  
5 Krausslich, H.G.; Grunewald, K. Cryo electron tomography of native HIV-1 budding  
6 sites. *PLoS pathogens* **2010**, *6*, e1001173, doi:10.1371/journal.ppat.1001173.
- 7 18. Aggarwal, A.; Iemma, T.L.; Shih, I.; Newsome, T.P.; McAllery, S.; Cunningham, A.L.;  
8 Turville, S.G. Mobilization of HIV spread by diaphanous 2 dependent filopodia in  
9 infected dendritic cells. *PLoS pathogens* **2012**, *8*, e1002762,  
10 doi:10.1371/journal.ppat.1002762.
- 11 19. Ladinsky, M.S.; Kieffer, C.; Olson, G.; Deruaz, M.; Vrbanac, V.; Tager, A.M.; Kwon,  
12 D.S.; Bjorkman, P.J. Electron tomography of HIV-1 infection in gut-associated  
13 lymphoid tissue. *PLoS pathogens* **2014**, *10*, e1003899,  
14 doi:10.1371/journal.ppat.1003899.
- 15 20. Ospina Stella, A.; Turville, S. All-Round Manipulation of the Actin Cytoskeleton by  
16 HIV. *Viruses* **2018**, *10*, doi:10.3390/v10020063.
- 17 21. Lu, J.; Qu, Y.; Liu, Y.; Jambusaria, R.; Han, Z.; Ruthel, G.; Freedman, B.D.; Harty,  
18 R.N. Host IQGAP1 and Ebola virus VP40 interactions facilitate virus-like particle  
19 egress. *Journal of virology* **2013**, *87*, 7777-7780, doi:10.1128/jvi.00470-13.
- 20 22. Jolly, C.; Mitar, I.; Sattentau, Q.J. Requirement for an intact T-cell actin and tubulin  
21 cytoskeleton for efficient assembly and spread of human immunodeficiency virus type  
22 1. *Journal of virology* **2007**, *81*, 5547-5560, doi:10.1128/jvi.01469-06.
- 23 23. Mattila, P.K.; Lappalainen, P. Filopodia: molecular architecture and cellular functions.  
24 *Nature reviews. Molecular cell biology* **2008**, *9*, 446-454, doi:10.1038/nrm2406.
- 25 24. Lehtimäki, J.; Hakala, M.; Lappalainen, P. Actin Filament Structures in Migrating  
26 Cells. *Handbook of experimental pharmacology* **2017**, *235*, 123-152,  
27 doi:10.1007/164\_2016\_28.
- 28 25. Guo, F.; Debidda, M.; Yang, L.; Williams, D.A.; Zheng, Y. Genetic deletion of Rac1  
29 GTPase reveals its critical role in actin stress fiber formation and focal adhesion  
30 complex assembly. *The Journal of biological chemistry* **2006**, *281*, 18652-18659,  
31 doi:10.1074/jbc.M603508200.
- 32 26. Steffen, A.; Ladwein, M.; Dimchev, G.A.; Hein, A.; Schwenkmezger, L.; Arens, S.;  
33 Ladwein, K.I.; Margit Holleboom, J.; Schur, F.; Victor Small, J., et al. Rac function is  
34 crucial for cell migration but is not required for spreading and focal adhesion formation.  
35 *Journal of cell science* **2013**, *126*, 4572-4588, doi:10.1242/jcs.118232.
- 36 27. Yamazaki, D.; Suetsugu, S.; Miki, H.; Kataoka, Y.; Nishikawa, S.; Fujiwara, T.;  
37 Yoshida, N.; Takenawa, T. WAVE2 is required for directed cell migration and  
38 cardiovascular development. *Nature* **2003**, *424*, 452-456, doi:10.1038/nature01770.
- 39 28. Wu, C.; Asokan, S.B.; Berginski, M.E.; Haynes, E.M.; Sharpless, N.E.; Griffith, J.D.;  
40 Gomez, S.M.; Bear, J.E. Arp2/3 is critical for lamellipodia and response to extracellular  
41 matrix cues but is dispensable for chemotaxis. *Cell* **2012**, *148*, 973-987,  
42 doi:10.1016/j.cell.2011.12.034.
- 43 29. Suraneni, P.; Rubinstein, B.; Unruh, J.R.; Durnin, M.; Hanein, D.; Li, R. The Arp2/3  
44 complex is required for lamellipodia extension and directional fibroblast cell migration.  
45 *The Journal of cell biology* **2012**, *197*, 239-251, doi:10.1083/jcb.201112113.
- 46 30. Young, L.E.; Heimsath, E.G.; Higgs, H.N. Cell type-dependent mechanisms for  
47 formin-mediated assembly of filopodia. *Molecular biology of the cell* **2015**, *26*, 4646-  
48 4659, doi:10.1091/mbc.E15-09-0626.

- 1 31. Eugenin, E.A.; Gaskill, P.J.; Berman, J.W. Tunneling nanotubes (TNT) are induced by  
2 HIV-infection of macrophages: a potential mechanism for intercellular HIV trafficking.  
3 *Cellular immunology* **2009**, *254*, 142-148, doi:10.1016/j.cellimm.2008.08.005.
- 4 32. Bourinbaiar, A.S.; Phillips, D.M. Transmission of human immunodeficiency virus from  
5 monocytes to epithelia. *Journal of acquired immune deficiency syndromes* **1991**, *4*, 56-  
6 63.
- 7 33. Pearce-Pratt, R.; Malamud, D.; Phillips, D.M. Role of the cytoskeleton in cell-to-cell  
8 transmission of human immunodeficiency virus. *Journal of virology* **1994**, *68*, 2898-  
9 2905.
- 10 34. Welch, M.D.; DePace, A.H.; Verma, S.; Iwamatsu, A.; Mitchison, T.J. The human  
11 Arp2/3 complex is composed of evolutionarily conserved subunits and is localized to  
12 cellular regions of dynamic actin filament assembly. *The Journal of cell biology* **1997**,  
13 *138*, 375-384, doi:10.1083/jcb.138.2.375.
- 14 35. Higgs, H.N.; Peterson, K.J. Phylogenetic analysis of the formin homology 2 domain.  
15 *Molecular biology of the cell* **2005**, *16*, 1-13, doi:10.1091/mbc.e04-07-0565.
- 16 36. Breitsprecher, D.; Goode, B.L. Formins at a glance. *Journal of cell science* **2013**, *126*,  
17 1-7, doi:10.1242/jcs.107250.
- 18 37. Narayan, K.; Danielson, C.M.; Lagarec, K.; Lowekamp, B.C.; Coffman, P.; Laquerre,  
19 A.; Phaneuf, M.W.; Hope, T.J.; Subramaniam, S. Multi-resolution correlative focused  
20 ion beam scanning electron microscopy: applications to cell biology. *Journal of*  
21 *structural biology* **2014**, *185*, 278-284, doi:10.1016/j.jsb.2013.11.008.
- 22 38. Narayan, K.; Subramaniam, S. Focused ion beams in biology. *Nature methods* **2015**,  
23 *12*, 1021-1031, doi:10.1038/nmeth.3623.
- 24 39. Felts, R.L.; Narayan, K.; Estes, J.D.; Shi, D.; Trubey, C.M.; Fu, J.; Hartnell, L.M.;  
25 Ruthel, G.T.; Schneider, D.K.; Nagashima, K., et al. 3D visualization of HIV transfer  
26 at the virological synapse between dendritic cells and T cells. *Proceedings of the*  
27 *National Academy of Sciences of the United States of America* **2010**, *107*, 13336-13341,  
28 doi:10.1073/pnas.1003040107.
- 29 40. Bennett, A.E.; Narayan, K.; Shi, D.; Hartnell, L.M.; Gousset, K.; He, H.; Lowekamp,  
30 B.C.; Yoo, T.S.; Bliss, D.; Freed, E.O., et al. Ion-abrasion scanning electron microscopy  
31 reveals surface-connected tubular conduits in HIV-infected macrophages. *PLoS*  
32 *pathogens* **2009**, *5*, e1000591, doi:10.1371/journal.ppat.1000591.
- 33 41. Alberts, A.S. Identification of a carboxyl-terminal diaphanous-related formin  
34 homology protein autoregulatory domain. *The Journal of biological chemistry* **2001**,  
35 *276*, 2824-2830, doi:10.1074/jbc.M006205200.
- 36 42. Lammers, M.; Rose, R.; Scrima, A.; Wittinghofer, A. The regulation of mDia1 by  
37 autoinhibition and its release by Rho\*GTP. *The EMBO journal* **2005**, *24*, 4176-4187,  
38 doi:10.1038/sj.emboj.7600879.
- 39 43. Rao, M.V.; Chu, P.H.; Hahn, K.M.; Zaidel-Bar, R. An optogenetic tool for the  
40 activation of endogenous diaphanous-related formins induces thickening of stress fibers  
41 without an increase in contractility. *Cytoskeleton (Hoboken, N.J.)* **2013**, *70*, 394-407,  
42 doi:10.1002/cm.21115.
- 43 44. Block, J.; Breitsprecher, D.; Kuhn, S.; Winterhoff, M.; Kage, F.; Geffers, R.; Duwe, P.;  
44 Rohn, J.L.; Baum, B.; Brakebusch, C., et al. FMNL2 drives actin-based protrusion and  
45 migration downstream of Cdc42. *Current biology : CB* **2012**, *22*, 1005-1012,  
46 doi:10.1016/j.cub.2012.03.064.
- 47 45. Blanchoin, L.; Michelot, A. Actin cytoskeleton: a team effort during actin assembly.  
48 *Current biology : CB* **2012**, *22*, R643-645, doi:10.1016/j.cub.2012.07.026.



- 1 46. Liu, B.; Dai, R.; Tian, C.J.; Dawson, L.; Gorelick, R.; Yu, X.F. Interaction of the human  
2 immunodeficiency virus type 1 nucleocapsid with actin. *Journal of virology* **1999**, *73*,  
3 2901-2908.
- 4 47. Wilk, T.; Gowen, B.; Fuller, S.D. Actin associates with the nucleocapsid domain of the  
5 human immunodeficiency virus Gag polyprotein. *Journal of virology* **1999**, *73*, 1931-  
6 1940.
- 7 48. Zhao, H.; Datta, S.A.K.; Kim, S.H.; To, S.C.; Chaturvedi, S.K.; Rein, A.; Schuck, P.  
8 Nucleic acid-induced dimerization of HIV-1 Gag protein. *The Journal of biological*  
9 *chemistry* **2019**, *294*, 16480-16493, doi:10.1074/jbc.RA119.010580.
- 10 49. Crist, R.M.; Datta, S.A.; Stephen, A.G.; Soheilian, F.; Mirro, J.; Fisher, R.J.;  
11 Nagashima, K.; Rein, A. Assembly properties of human immunodeficiency virus type  
12 1 Gag-leucine zipper chimeras: implications for retrovirus assembly. *Journal of*  
13 *virology* **2009**, *83*, 2216-2225, doi:10.1128/jvi.02031-08.
- 14 50. von Schwedler, U.K.; Stray, K.M.; Garrus, J.E.; Sundquist, W.I. Functional surfaces of  
15 the human immunodeficiency virus type 1 capsid protein. *Journal of virology* **2003**, *77*,  
16 5439-5450, doi:10.1128/jvi.77.9.5439-5450.2003.
- 17 51. Hogue, I.B.; Grover, J.R.; Soheilian, F.; Nagashima, K.; Ono, A. Gag induces the  
18 coalescence of clustered lipid rafts and tetraspanin-enriched microdomains at HIV-1  
19 assembly sites on the plasma membrane. *Journal of virology* **2011**, *85*, 9749-9766,  
20 doi:10.1128/jvi.00743-11.
- 21 52. Ott, D.E.; Coren, L.V.; Johnson, D.G.; Kane, B.P.; Sowder, R.C., 2nd; Kim, Y.D.;  
22 Fisher, R.J.; Zhou, X.Z.; Lu, K.P.; Henderson, L.E. Actin-binding cellular proteins  
23 inside human immunodeficiency virus type 1. *Virology* **2000**, *266*, 42-51,  
24 doi:10.1006/viro.1999.0075.
- 25 53. Ott, D.E.; Coren, L.V.; Kane, B.P.; Busch, L.K.; Johnson, D.G.; Sowder, R.C., 2nd;  
26 Chertova, E.N.; Arthur, L.O.; Henderson, L.E. Cytoskeletal proteins inside human  
27 immunodeficiency virus type 1 virions. *Journal of virology* **1996**, *70*, 7734-7743.
- 28 54. Chertova, E.; Chertov, O.; Coren, L.V.; Roser, J.D.; Trubey, C.M.; Bess, J.W., Jr.;  
29 Sowder, R.C., 2nd; Barsov, E.; Hood, B.L.; Fisher, R.J., et al. Proteomic and  
30 biochemical analysis of purified human immunodeficiency virus type 1 produced from  
31 infected monocyte-derived macrophages. *Journal of virology* **2006**, *80*, 9039-9052,  
32 doi:10.1128/jvi.01013-06.
- 33 55. Linde, M.E.; Colquhoun, D.R.; Ubaida Mohien, C.; Kole, T.; Aquino, V.; Cotter, R.;  
34 Edwards, N.; Hildreth, J.E.; Graham, D.R. The conserved set of host proteins  
35 incorporated into HIV-1 virions suggests a common egress pathway in multiple cell  
36 types. *Journal of proteome research* **2013**, *12*, 2045-2054, doi:10.1021/pr300918r.
- 37 56. Stauffer, S.; Rahman, S.A.; de Marco, A.; Carlson, L.A.; Glass, B.; Oberwinkler, H.;  
38 Herold, N.; Briggs, J.A.; Muller, B.; Grunewald, K., et al. The nucleocapsid domain of  
39 Gag is dispensable for actin incorporation into HIV-1 and for association of viral  
40 budding sites with cortical F-actin. *Journal of virology* **2014**, *88*, 7893-7903,  
41 doi:10.1128/jvi.00428-14.
- 42 57. Delon, I.; Brown, N.H. Integrins and the actin cytoskeleton. *Current opinion in cell*  
43 *biology* **2007**, *19*, 43-50, doi:10.1016/j.ceb.2006.12.013.
- 44 58. Nelson, W.J.; Drees, F.; Yamada, S. Interaction of cadherin with the actin cytoskeleton.  
45 *Novartis Foundation symposium* **2005**, *269*, 159-168; discussion 168-177, 223-130.
- 46 59. Owen, D.; Campbell, L.J.; Littlefield, K.; Evetts, K.A.; Li, Z.; Sacks, D.B.; Lowe, P.N.;  
47 Mott, H.R. The IQGAP1-Rac1 and IQGAP1-Cdc42 interactions: interfaces differ  
48 between the complexes. *The Journal of biological chemistry* **2008**, *283*, 1692-1704,  
49 doi:10.1074/jbc.M707257200.

- 1 60. Fukata, M.; Nakagawa, M.; Itoh, N.; Kawajiri, A.; Yamaga, M.; Kuroda, S.; Kaibuchi,  
2 K. Involvement of IQGAP1, an effector of Rac1 and Cdc42 GTPases, in cell-cell  
3 dissociation during cell scattering. *Molecular and cellular biology* **2001**, *21*, 2165-  
4 2183, doi:10.1128/mcb.21.6.2165-2183.2001.
- 5 61. Brandt, D.T.; Grosse, R. Get to grips: steering local actin dynamics with IQGAPs.  
6 *EMBO reports* **2007**, *8*, 1019-1023, doi:10.1038/sj.embor.7401089.
- 7 62. Swart-Mataraza, J.M.; Li, Z.; Sacks, D.B. IQGAP1 is a component of Cdc42 signaling  
8 to the cytoskeleton. *The Journal of biological chemistry* **2002**, *277*, 24753-24763,  
9 doi:10.1074/jbc.M111165200.
- 10 63. Sugihara, K.; Nakatsuji, N.; Nakamura, K.; Nakao, K.; Hashimoto, R.; Otani, H.;  
11 Sakagami, H.; Kondo, H.; Nozawa, S.; Aiba, A., et al. Rac1 is required for the formation  
12 of three germ layers during gastrulation. *Oncogene* **1998**, *17*, 3427-3433,  
13 doi:10.1038/sj.onc.1202595.
- 14 64. Hart, T.; Chandrashekhar, M.; Aregger, M.; Steinhart, Z.; Brown, K.R.; MacLeod, G.;  
15 Mis, M.; Zimmermann, M.; Fradet-Turcotte, A.; Sun, S., et al. High-Resolution  
16 CRISPR Screens Reveal Fitness Genes and Genotype-Specific Cancer Liabilities. *Cell*  
17 **2015**, *163*, 1515-1526, doi:10.1016/j.cell.2015.11.015.
- 18 65. Chen, B.; Chou, H.T.; Brautigam, C.A.; Xing, W.; Yang, S.; Henry, L.; Doolittle, L.K.;  
19 Walz, T.; Rosen, M.K. Rac1 GTPase activates the WAVE regulatory complex through  
20 two distinct binding sites. *eLife* **2017**, *6*, doi:10.7554/eLife.29795.
- 21 66. Yan, C.; Martinez-Quiles, N.; Eden, S.; Shibata, T.; Takeshima, F.; Shinkura, R.;  
22 Fujiwara, Y.; Bronson, R.; Snapper, S.B.; Kirschner, M.W., et al. WAVE2 deficiency  
23 reveals distinct roles in embryogenesis and Rac-mediated actin-based motility. *The*  
24 *EMBO journal* **2003**, *22*, 3602-3612, doi:10.1093/emboj/cdg350.
- 25 67. Rahman, S.A.; Koch, P.; Weichsel, J.; Godinez, W.J.; Schwarz, U.; Rohr, K.; Lamb,  
26 D.C.; Krausslich, H.G.; Muller, B. Investigating the role of F-actin in human  
27 immunodeficiency virus assembly by live-cell microscopy. *Journal of virology* **2014**,  
28 *88*, 7904-7914, doi:10.1128/jvi.00431-14.
- 29 68. Daste, F.; Walrant, A.; Holst, M.R.; Gadsby, J.R.; Mason, J.; Lee, J.E.; Brook, D.;  
30 Mettlen, M.; Larsson, E.; Lee, S.F., et al. Control of actin polymerization via the  
31 coincidence of phosphoinositides and high membrane curvature. *The Journal of cell*  
32 *biology* **2017**, *216*, 3745-3765, doi:10.1083/jcb.201704061.
- 33 69. Gallop, J.L.; Walrant, A.; Cantley, L.C.; Kirschner, M.W. Phosphoinositides and  
34 membrane curvature switch the mode of actin polymerization via selective recruitment  
35 of toca-1 and Snx9. *Proceedings of the National Academy of Sciences of the United*  
36 *States of America* **2013**, *110*, 7193-7198, doi:10.1073/pnas.1305286110.
- 37 70. Sabo, Y.; de Los Santos, K.; Goff, S.P. IQGAP1 Negatively Regulates HIV-1 Gag  
38 Trafficking and Virion Production. *Cell Rep* **2020**, *30*, 4065-4081 e4064,  
39 doi:10.1016/j.celrep.2020.03.002.
- 40 71. Brandt, D.T.; Marion, S.; Griffiths, G.; Watanabe, T.; Kaibuchi, K.; Grosse, R. Dial  
41 and IQGAP1 interact in cell migration and phagocytic cup formation. *The Journal of*  
42 *cell biology* **2007**, *178*, 193-200, doi:10.1083/jcb.200612071.
- 43 72. Bensenor, L.B.; Kan, H.M.; Wang, N.; Wallrabe, H.; Davidson, L.A.; Cai, Y.; Schafer,  
44 D.A.; Bloom, G.S. IQGAP1 regulates cell motility by linking growth factor signaling  
45 to actin assembly. *Journal of cell science* **2007**, *120*, 658-669, doi:10.1242/jcs.03376.
- 46 73. Mehedi, M.; Collins, P.L.; Buchholz, U.J. A novel host factor for human respiratory  
47 syncytial virus. *Communicative & integrative biology* **2017**, *10*, e1319025,  
48 doi:10.1080/19420889.2017.1319025.
- 49 74. Mehedi, M.; McCarty, T.; Martin, S.E.; Le Nouen, C.; Buehler, E.; Chen, Y.C.;  
50 Smelkinson, M.; Ganesan, S.; Fischer, E.R.; Brock, L.G., et al. Actin-Related Protein

- 1 2 (ARP2) and Virus-Induced Filopodia Facilitate Human Respiratory Syncytial Virus  
2 Spread. *PLoS pathogens* **2016**, *12*, e1006062, doi:10.1371/journal.ppat.1006062.
- 3 75. Martinez, M.G.; Kielian, M. Intercellular Extensions Are Induced by the Alphavirus  
4 Structural Proteins and Mediate Virus Transmission. *PLoS pathogens* **2016**, *12*,  
5 e1006061, doi:10.1371/journal.ppat.1006061.
- 6 76. Sherer, N.M.; Lehmann, M.J.; Jimenez-Soto, L.F.; Horensavitz, C.; Pypaert, M.;  
7 Mothes, W. Retroviruses can establish filopodial bridges for efficient cell-to-cell  
8 transmission. *Nature cell biology* **2007**, *9*, 310-315, doi:10.1038/ncb1544.
- 9 77. Cifuentes-Munoz, N.; Dutch, R.E.; Cattaneo, R. Direct cell-to-cell transmission of  
10 respiratory viruses: The fast lanes. *PLoS pathogens* **2018**, *14*, e1007015,  
11 doi:10.1371/journal.ppat.1007015.
- 12 78. Fukata, M.; Kuroda, S.; Fujii, K.; Nakamura, T.; Shoji, I.; Matsuura, Y.; Okawa, K.;  
13 Iwamatsu, A.; Kikuchi, A.; Kaibuchi, K. Regulation of cross-linking of actin filament  
14 by IQGAP1, a target for Cdc42. *The Journal of biological chemistry* **1997**, *272*, 29579-  
15 29583, doi:10.1074/jbc.272.47.29579.
- 16 79. Bendjennat, M.; Saffarian, S. The Race against Protease Activation Defines the Role  
17 of ESCRTs in HIV Budding. *PLoS pathogens* **2016**, *12*, e1005657,  
18 doi:10.1371/journal.ppat.1005657.
- 19 80. Ziv, N.E.; Smith, S.J. Evidence for a role of dendritic filopodia in synaptogenesis and  
20 spine formation. *Neuron* **1996**, *17*, 91-102, doi:10.1016/s0896-6273(00)80283-4.
- 21 81. Niell, C.M.; Meyer, M.P.; Smith, S.J. In vivo imaging of synapse formation on a  
22 growing dendritic arbor. *Nature neuroscience* **2004**, *7*, 254-260, doi:10.1038/nn1191.
- 23 82. Vasioukhin, V.; Bauer, C.; Yin, M.; Fuchs, E. Directed actin polymerization is the  
24 driving force for epithelial cell-cell adhesion. *Cell* **2000**, *100*, 209-219,  
25 doi:10.1016/s0092-8674(00)81559-7.
- 26 83. Menna, E.; Fossati, G.; Scita, G.; Matteoli, M. From filopodia to synapses: the role of  
27 actin-capping and anti-capping proteins. *The European journal of neuroscience* **2011**,  
28 *34*, 1655-1662, doi:10.1111/j.1460-9568.2011.07897.x.
- 29 84. Mothes, W.; Sherer, N.M.; Jin, J.; Zhong, P. Virus cell-to-cell transmission. *Journal of*  
30 *virology* **2010**, *84*, 8360-8368, doi:10.1128/jvi.00443-10.
- 31 85. Izumi, G.; Sakisaka, T.; Baba, T.; Tanaka, S.; Morimoto, K.; Takai, Y. Endocytosis of  
32 E-cadherin regulated by Rac and Cdc42 small G proteins through IQGAP1 and actin  
33 filaments. *The Journal of cell biology* **2004**, *166*, 237-248, doi:10.1083/jcb.200401078.
- 34 86. Kuroda, S.; Fukata, M.; Nakagawa, M.; Kaibuchi, K. Cdc42, Rac1, and their effector  
35 IQGAP1 as molecular switches for cadherin-mediated cell-cell adhesion. *Biochem*  
36 *Biophys Res Commun* **1999**, *262*, 1-6, doi:10.1006/bbrc.1999.1122.
- 37 87. Morita, E.; Sandrin, V.; Chung, H.Y.; Morham, S.G.; Gygi, S.P.; Rodesch, C.K.;  
38 Sundquist, W.I. Human ESCRT and ALIX proteins interact with proteins of the  
39 midbody and function in cytokinesis. *The EMBO journal* **2007**, *26*, 4215-4227,  
40 doi:10.1038/sj.emboj.7601850.
- 41 88. Le Clainche, C.; Schlaepfer, D.; Ferrari, A.; Klingauf, M.; Grohmanova, K.;  
42 Veligodskiy, A.; Didry, D.; Le, D.; Egile, C.; Carlier, M.F., et al. IQGAP1 stimulates  
43 actin assembly through the N-WASP-Arp2/3 pathway. *The Journal of biological*  
44 *chemistry* **2007**, *282*, 426-435, doi:10.1074/jbc.M607711200.
- 45 89. Choudhuri, K.; Llodra, J.; Roth, E.W.; Tsai, J.; Gordo, S.; Wucherpfennig, K.W.; Kam,  
46 L.C.; Stokes, D.L.; Dustin, M.L. Polarized release of T-cell-receptor-enriched  
47 microvesicles at the immunological synapse. *Nature* **2014**, *507*, 118-123,  
48 doi:10.1038/nature12951.
- 49 90. Chemin, K.; Bohineust, A.; Dogniaux, S.; Turret, M.; Guegan, S.; Miro, F.; Hivroz,  
50 C. Cytokine secretion by CD4+ T cells at the immunological synapse requires Cdc42-

- 1 dependent local actin remodeling but not microtubule organizing center polarity.  
2 *Journal of immunology (Baltimore, Md. : 1950)* **2012**, *189*, 2159-2168,  
3 doi:10.4049/jimmunol.1200156.
- 4 91. Stinchcombe, J.C.; Majorovits, E.; Bossi, G.; Fuller, S.; Griffiths, G.M. Centrosome  
5 polarization delivers secretory granules to the immunological synapse. *Nature* **2006**,  
6 *443*, 462-465, doi:10.1038/nature05071.
- 7 92. Vardhana, S.; Choudhuri, K.; Varma, R.; Dustin, M.L. Essential role of ubiquitin and  
8 TSG101 protein in formation and function of the central supramolecular activation  
9 cluster. *Immunity* **2010**, *32*, 531-540, doi:10.1016/j.immuni.2010.04.005.
- 10 93. Rittmeyer, E.N.; Daniel, S.; Hsu, S.C.; Osman, M.A. A dual role for IQGAP1 in  
11 regulating exocytosis. *Journal of cell science* **2008**, *121*, 391-403,  
12 doi:10.1242/jcs.016881.
- 13 94. Damsky, C.H.; Sheffield, J.B.; Tuszynski, G.P.; Warren, L. Is there a role for actin in  
14 virus budding? *The Journal of cell biology* **1977**, *75*, 593-605,  
15 doi:10.1083/jcb.75.2.593.
- 16 95. Jouvenet, N.; Windsor, M.; Rietdorf, J.; Hawes, P.; Monaghan, P.; Way, M.; Wileman,  
17 T. African swine fever virus induces filopodia-like projections at the plasma membrane.  
18 *Cellular microbiology* **2006**, *8*, 1803-1811, doi:10.1111/j.1462-5822.2006.00750.x.
- 19 96. Kolesnikova, L.; Bohil, A.B.; Cheney, R.E.; Becker, S. Budding of Marburgvirus is  
20 associated with filopodia. *Cellular microbiology* **2007**, *9*, 939-951, doi:10.1111/j.1462-  
21 5822.2006.00842.x.
- 22 97. Kolesnikova, L.; Heck, S.; Matrosovich, T.; Klenk, H.D.; Becker, S.; Matrosovich, M.  
23 Influenza virus budding from the tips of cellular microvilli in differentiated human  
24 airway epithelial cells. *The Journal of general virology* **2013**, *94*, 971-976,  
25 doi:10.1099/vir.0.049239-0.
- 26 98. Carpenter, J.E.; Hutchinson, J.A.; Jackson, W.; Grose, C. Egress of light particles  
27 among filopodia on the surface of Varicella-Zoster virus-infected cells. *Journal of*  
28 *virology* **2008**, *82*, 2821-2835, doi:10.1128/jvi.01821-07.
- 29 99. Chang, K.; Baginski, J.; Hassan, S.F.; Volin, M.; Shukla, D.; Tiwari, V. Filopodia and  
30 Viruses: An Analysis of Membrane Processes in Entry Mechanisms. *Frontiers in*  
31 *microbiology* **2016**, *7*, 300, doi:10.3389/fmicb.2016.00300.
- 32 100. Lemichez, E.; Aktories, K. Hijacking of Rho GTPases during bacterial infection.  
33 *Experimental cell research* **2013**, *319*, 2329-2336, doi:10.1016/j.yexcr.2013.04.021.
- 34 101. Van den Broeke, C.; Jacob, T.; Favoreel, H.W. Rho'ing in and out of cells: viral  
35 interactions with Rho GTPase signaling. *Small GTPases* **2014**, *5*, e28318,  
36 doi:10.4161/sgtp.28318.
- 37 102. Gouin, E.; Welch, M.D.; Cossart, P. Actin-based motility of intracellular pathogens.  
38 *Current opinion in microbiology* **2005**, *8*, 35-45, doi:10.1016/j.mib.2004.12.013.
- 39 103. Small, J.V. Pushing with actin: from cells to pathogens. *Biochemical Society*  
40 *transactions* **2015**, *43*, 84-91, doi:10.1042/bst20140184.
- 41 104. Welch, M.D.; Way, M. Arp2/3-mediated actin-based motility: a tail of pathogen abuse.  
42 *Cell host & microbe* **2013**, *14*, 242-255, doi:10.1016/j.chom.2013.08.011.
- 43 105. Kim, H.; White, C.D.; Sacks, D.B. IQGAP1 in microbial pathogenesis: Targeting the  
44 actin cytoskeleton. *FEBS letters* **2011**, *585*, 723-729,  
45 doi:10.1016/j.febslet.2011.01.041.
- 46 106. Leung, J.; Yueh, A.; Appah, F.S., Jr.; Yuan, B.; de los Santos, K.; Goff, S.P. Interaction  
47 of Moloney murine leukemia virus matrix protein with IQGAP. *The EMBO journal*  
48 **2006**, *25*, 2155-2166, doi:10.1038/sj.emboj.7601097.
- 49 107. Gladue, D.P.; Holinka, L.G.; Fernandez-Sainz, I.J.; Prarat, M.V.; O'Donnell, V.;  
50 Vepkhvadze, N.G.; Lu, Z.; Risatti, G.R.; Borca, M.V. Interaction between Core protein

- 1 of classical swine fever virus with cellular IQGAP1 protein appears essential for  
2 virulence in swine. *Virology* **2011**, *412*, 68-74, doi:10.1016/j.virol.2010.12.060.
- 3 108. Dolnik, O.; Kolesnikova, L.; Welsch, S.; Strecker, T.; Schudt, G.; Becker, S. Interaction  
4 with Tsg101 is necessary for the efficient transport and release of nucleocapsids in  
5 marburg virus-infected cells. *PLoS pathogens* **2014**, *10*, e1004463,  
6 doi:10.1371/journal.ppat.1004463.
- 7 109. Dolnik, O.; Stevermann, L.; Kolesnikova, L.; Becker, S. Marburg virus inclusions: A  
8 virus-induced microcompartment and interface to multivesicular bodies and the late  
9 endosomal compartment. *European journal of cell biology* **2015**, *94*, 323-331,  
10 doi:10.1016/j.ejcb.2015.05.006.  
11

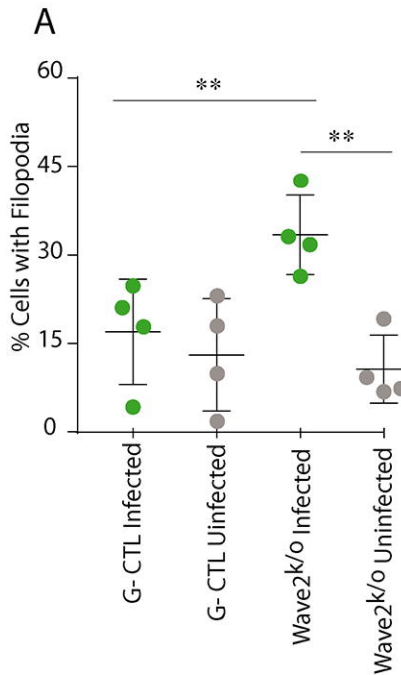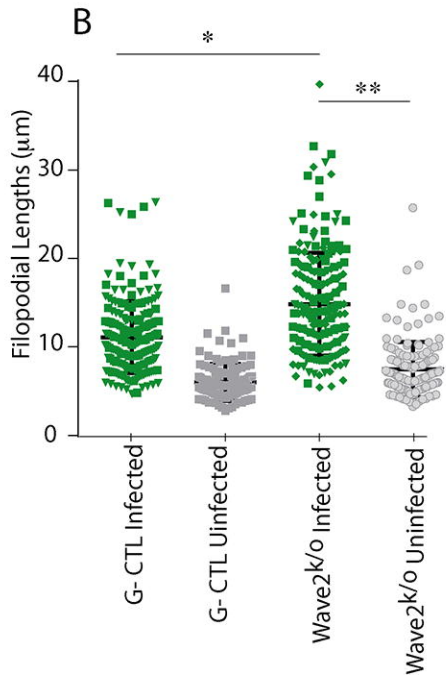

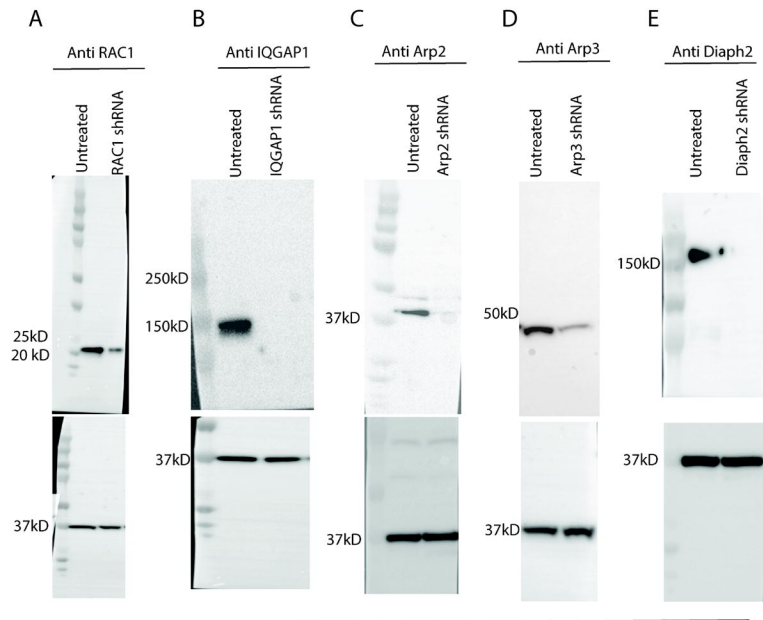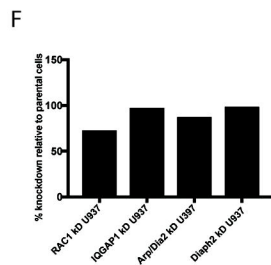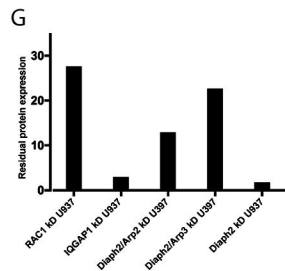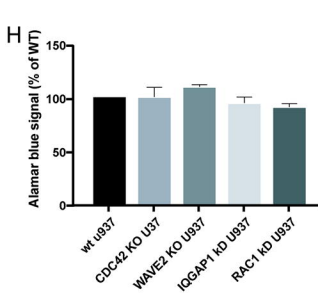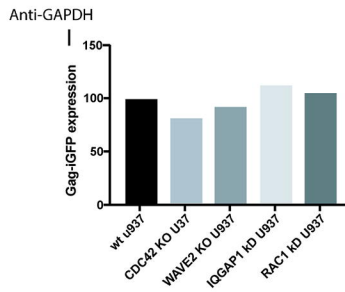

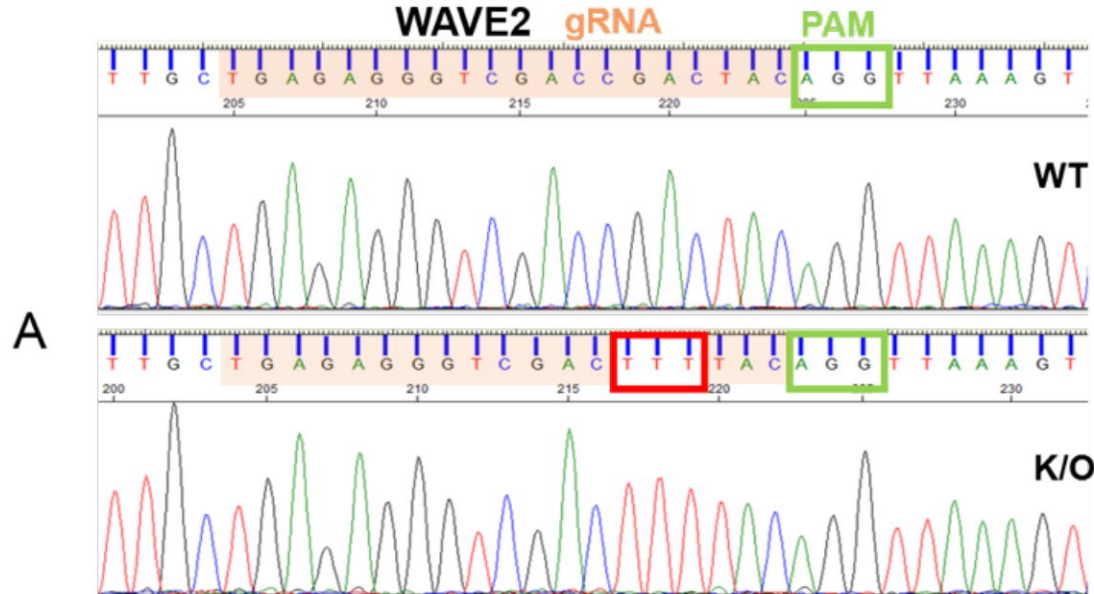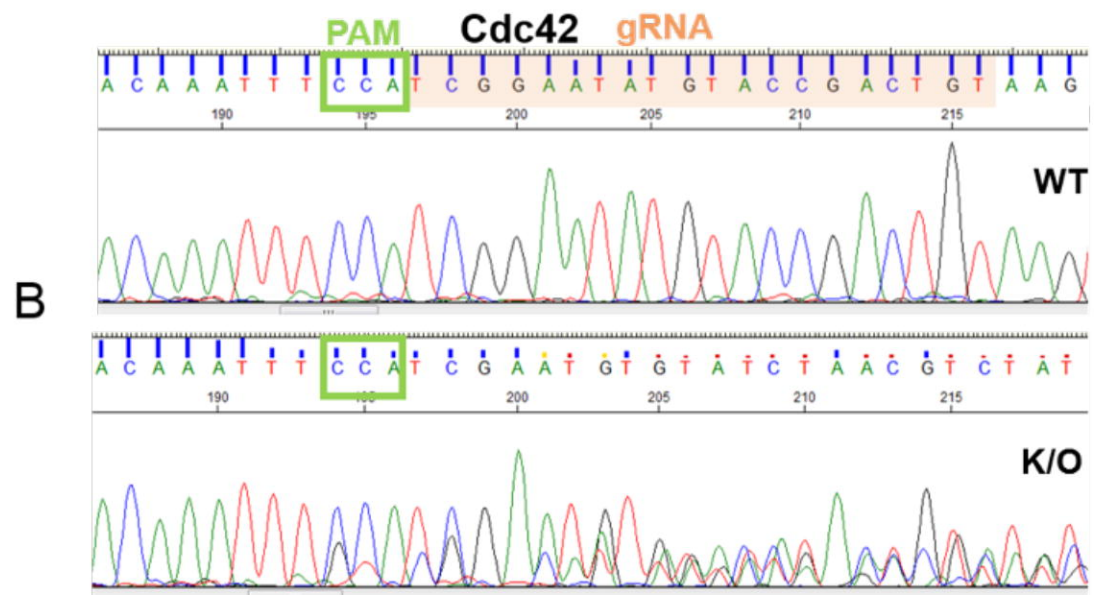



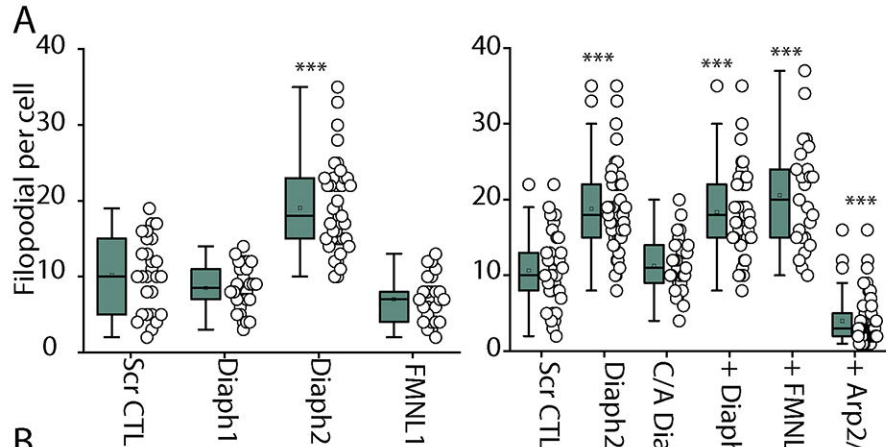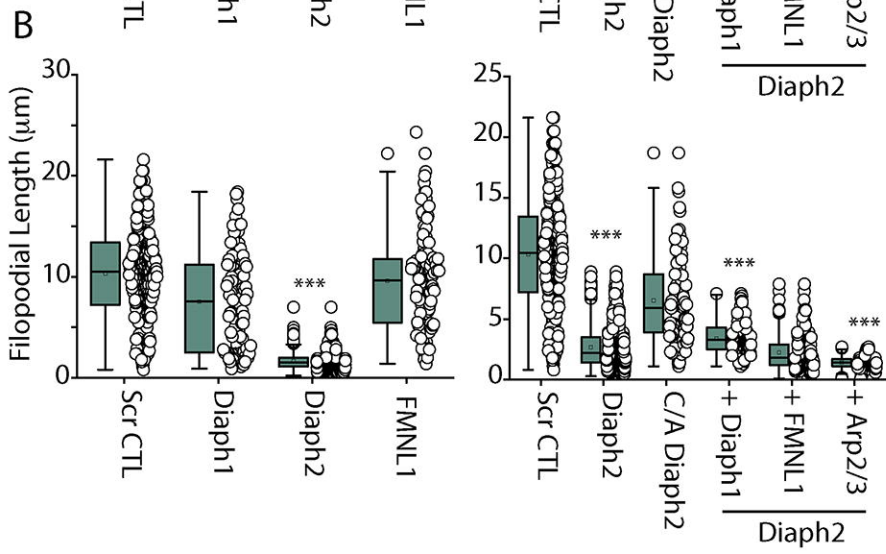

A

## HIV Assembly at Curvature

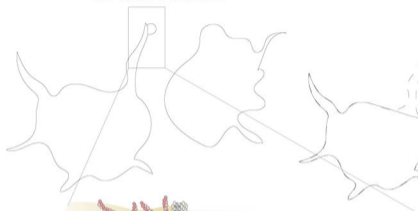

B

## Synapse Maturation

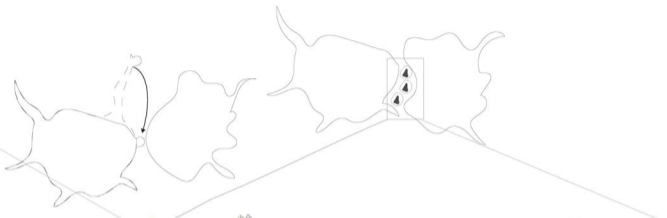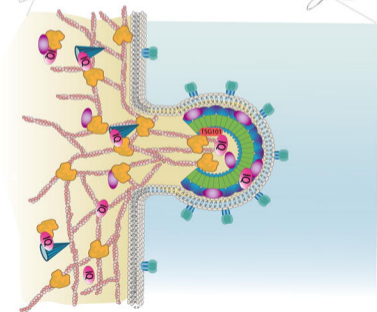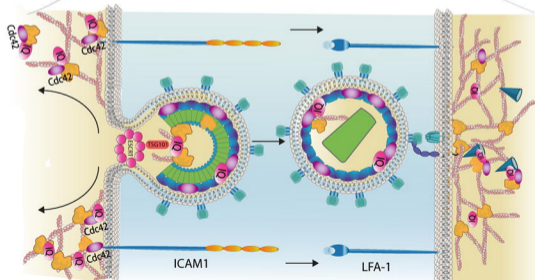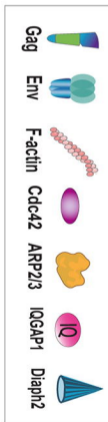

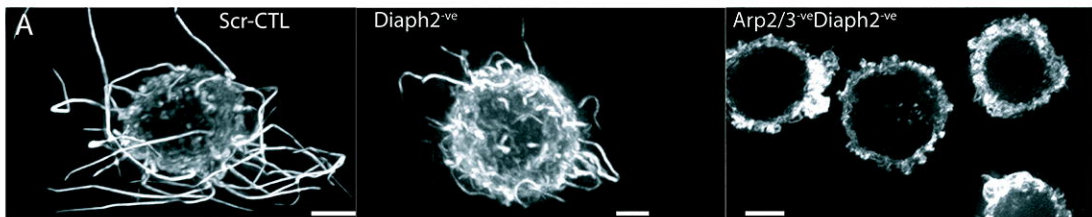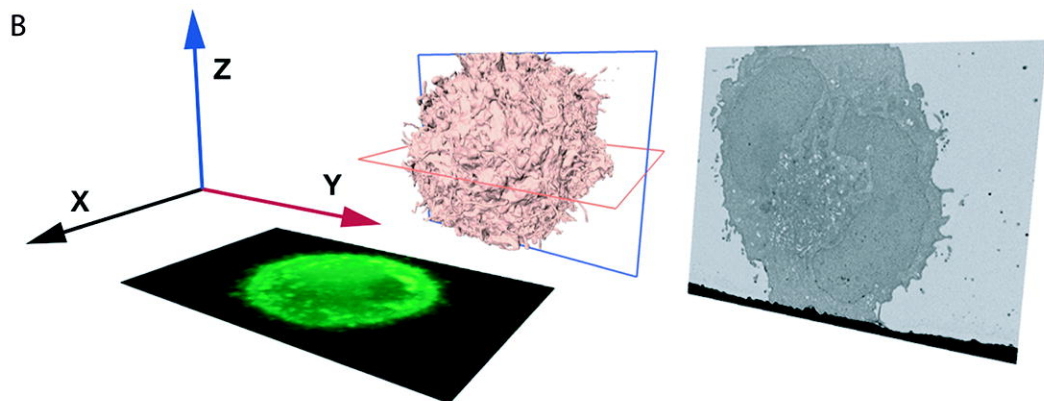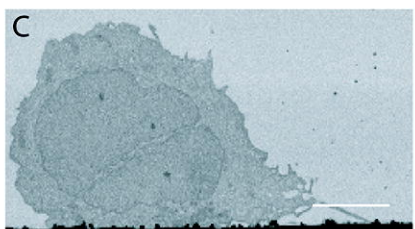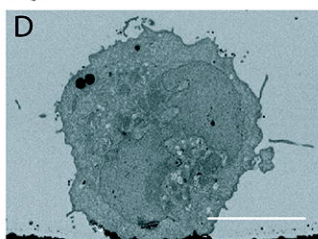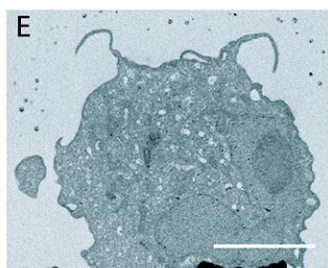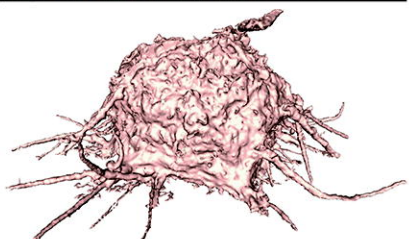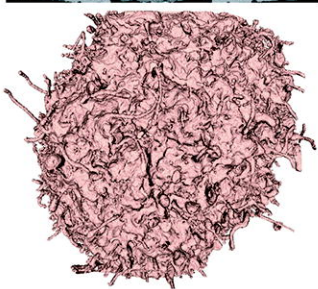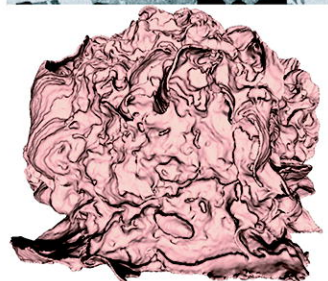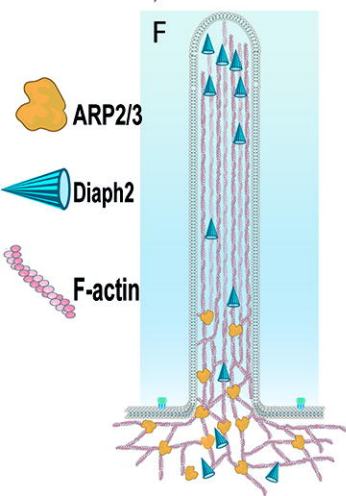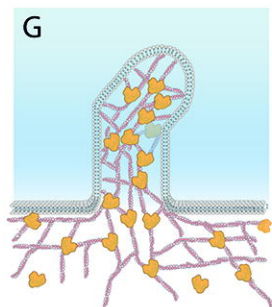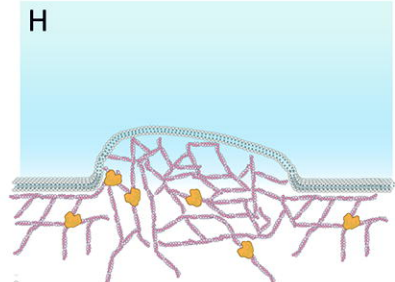

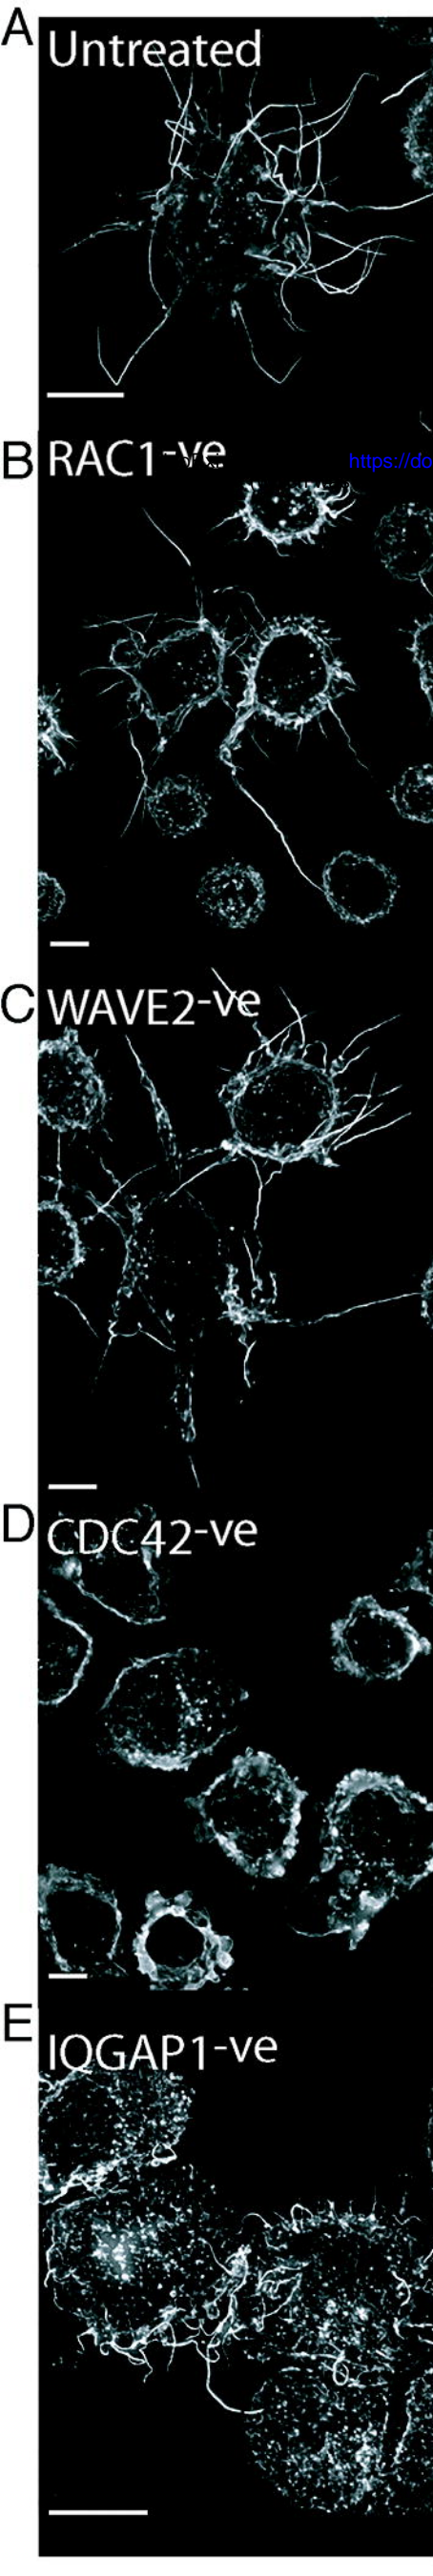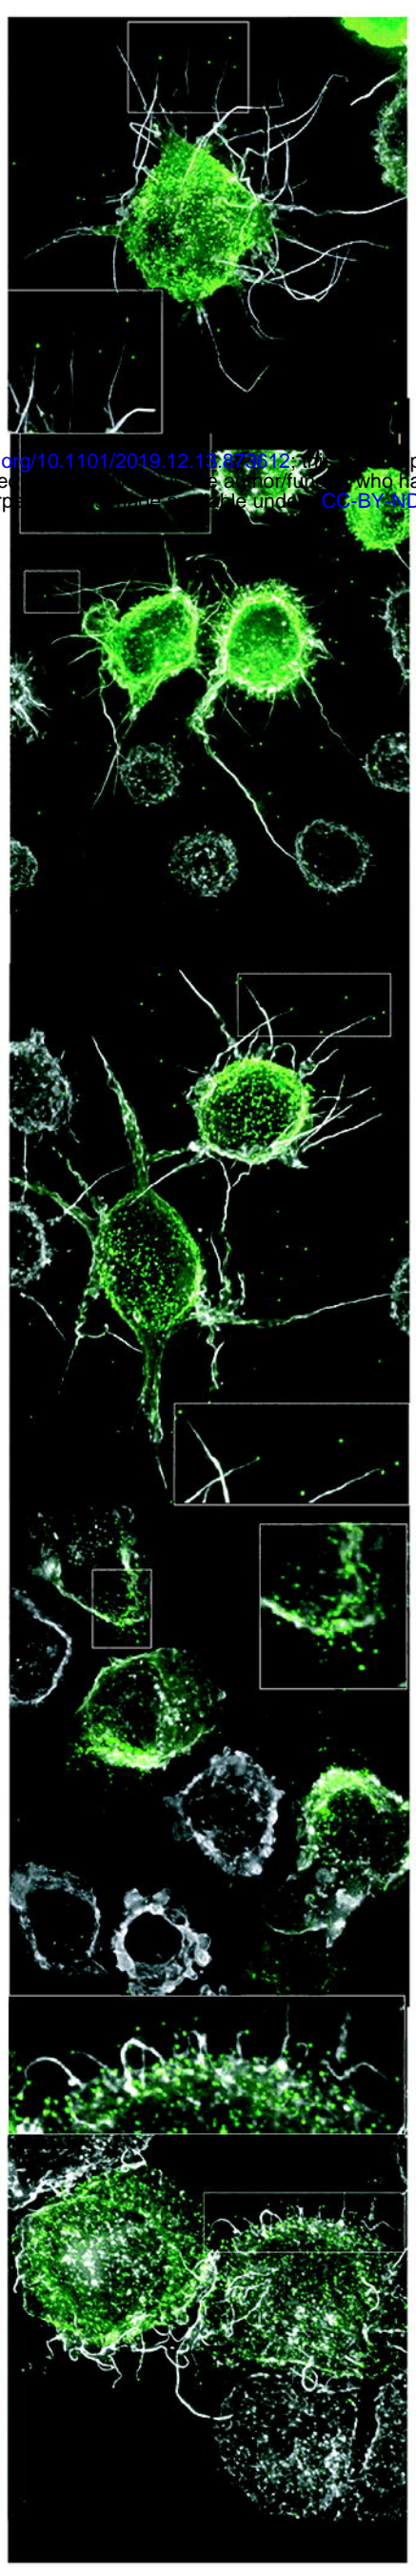

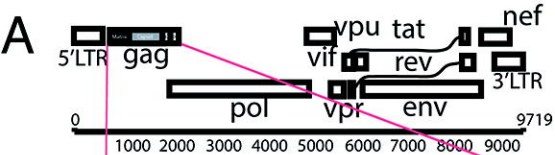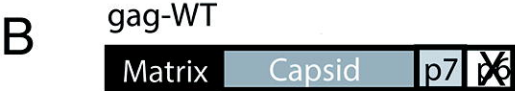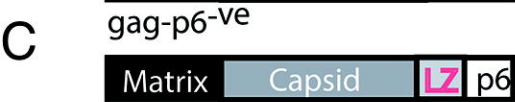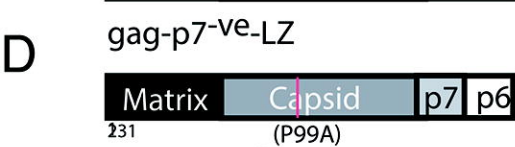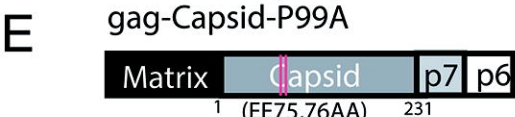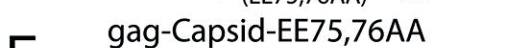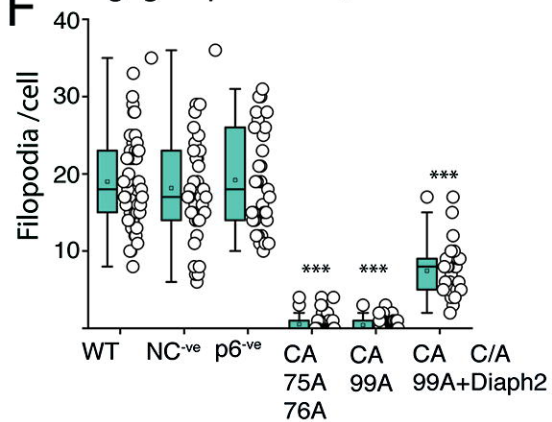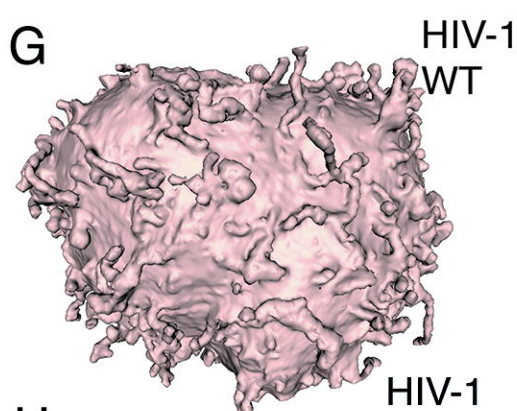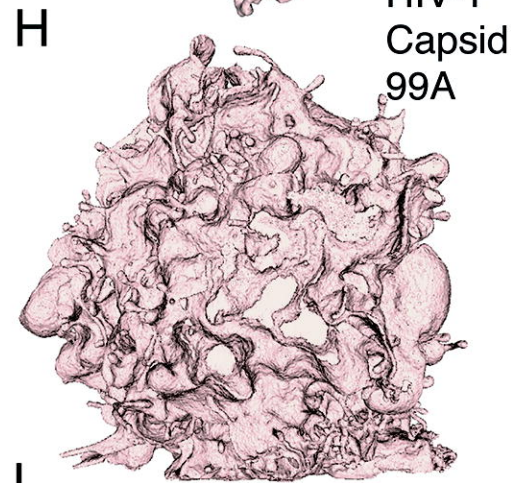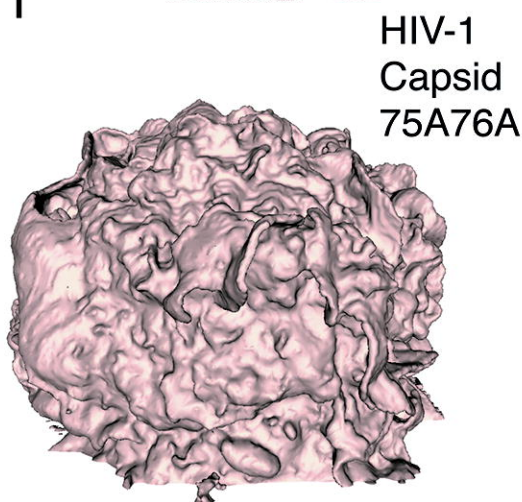

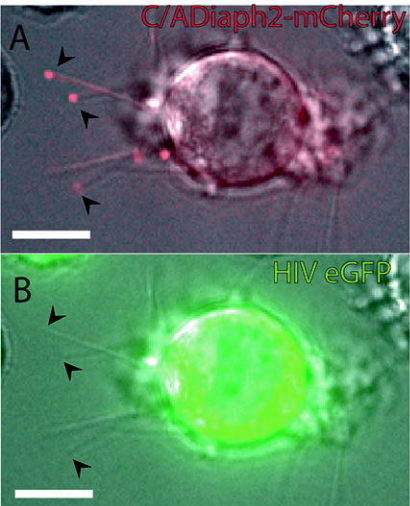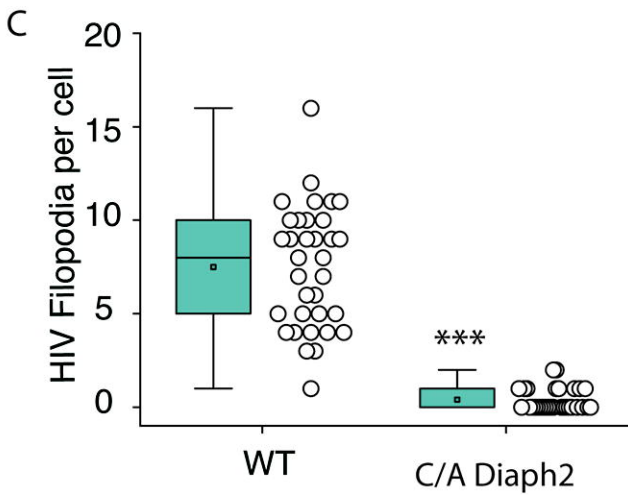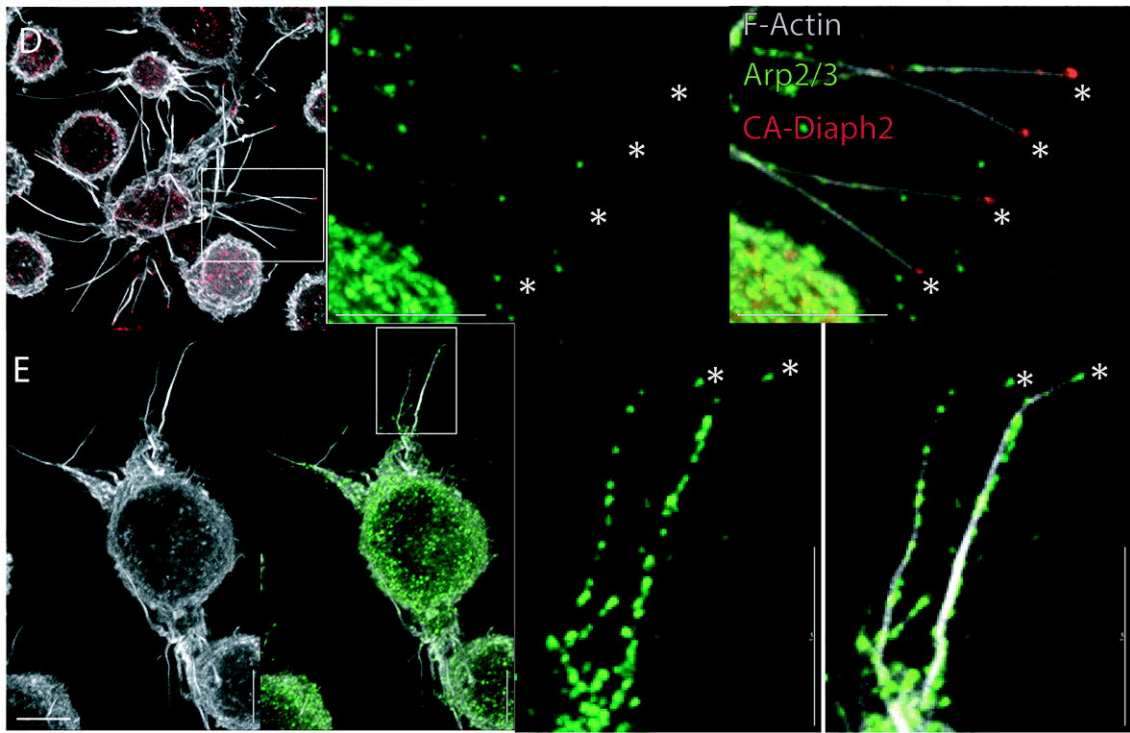

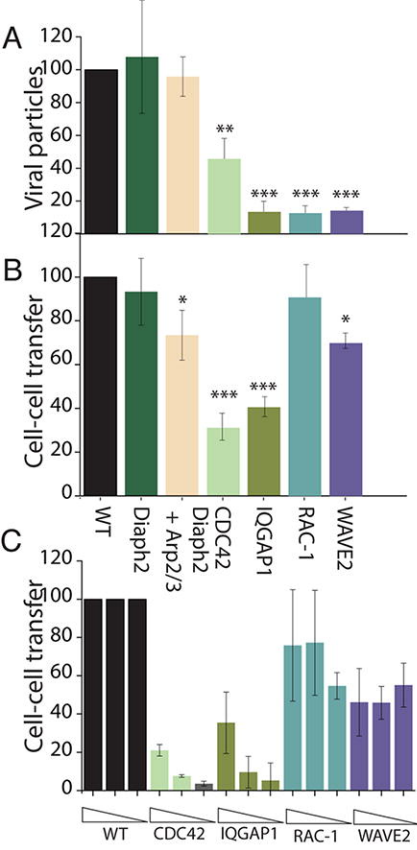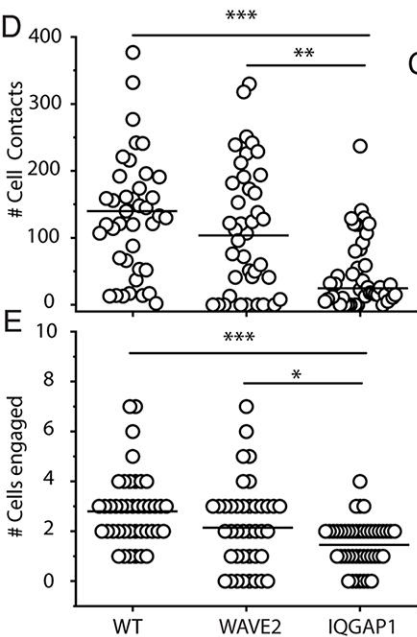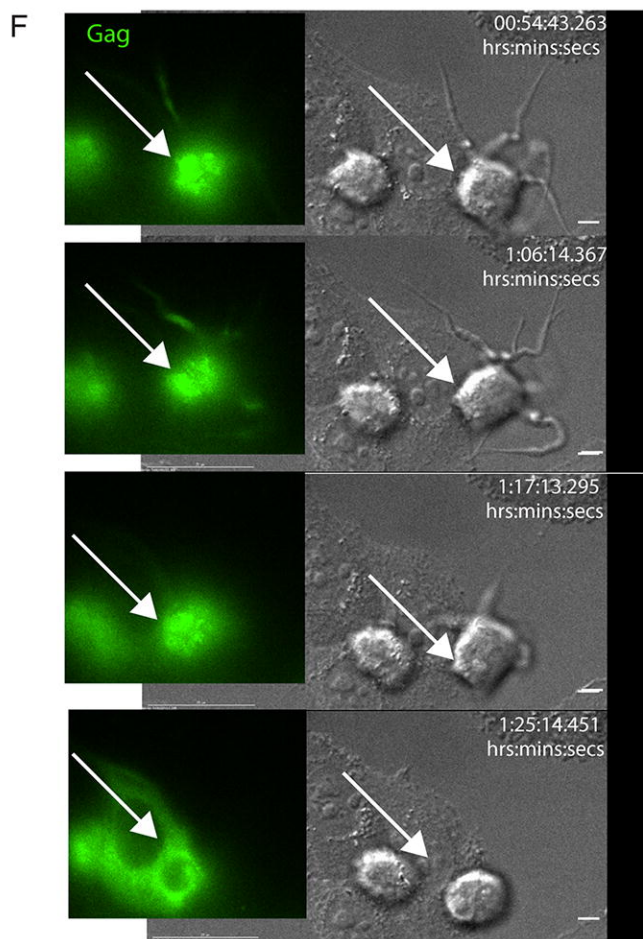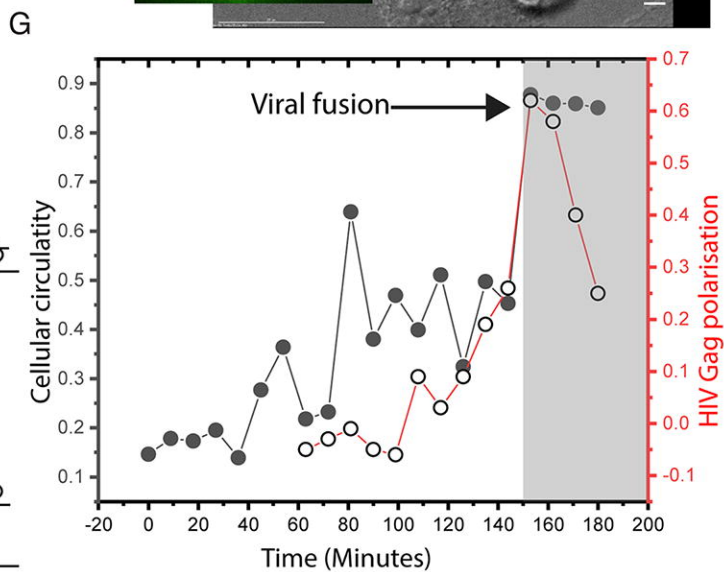

# A Diaph2-ve

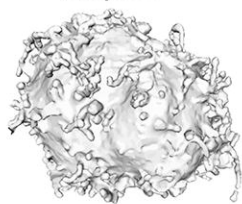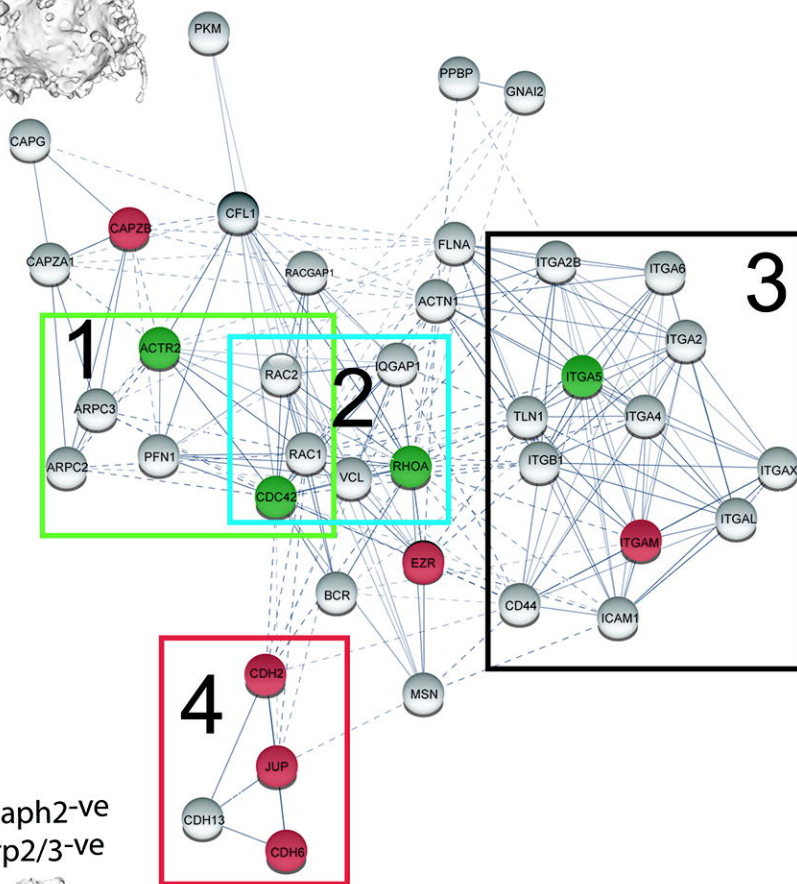

# B Diaph2-ve Arp2/3-ve

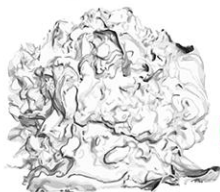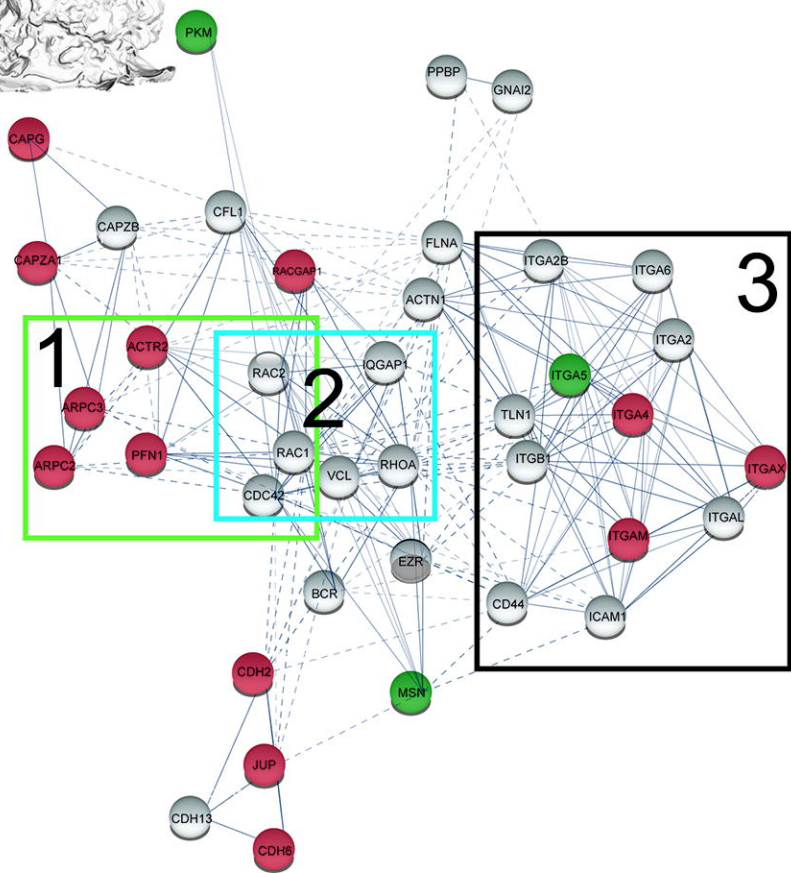

Source: https://www.biorxiv.org/content/10.1101/2019.12.13.873612v2.full.pdf
